# Supplementary material for: Superalkali-alkaline earthide ion pairs of δ+(AM-HMHC)-AM′δ− (AM = Li, Na and K; AM′ = Be, Mg and Ca) possessing large NLO responses and excellent electronic stabilities and alkalide characteristics: a DFT study
Source: Royal Society of Chemistry journal article supplement (doi:10.1039/d3cp04627c), 2024-01-01
Supplement: d3cp04627c1.pdf [file d3cp04627c1.pdf]

**Superalkali-alkaline earthide ion pairs of  $\delta^+(\text{AM-HMHC})-\text{AM}'\delta^-$  (AM = Li, Na & K; AM' = Be, Mg & Ca) possessing large NLO responses and excellent electronic stabilities and alkalide characteristics: A DFT study**

Jianguan Huang,<sup>a</sup> Yin-Feng Wang,<sup>\*a</sup> Kai Yang,<sup>a</sup> Wen Zhang,<sup>a</sup> Zhi-Jun Wang,<sup>a</sup> Xue-Xia Liu,<sup>a</sup> and Zhi-Ru Li<sup>\*,b</sup>

<sup>a</sup>*Jiangxi Province Key Laboratory of Coordination Chemistry, School of Chemistry and Chemical Engineering, Jinggangshan University, Ji'an, Jiangxi 343009 (P.R. China).*

<sup>b</sup>*Institute of Theoretical Chemistry, Jilin University, Changchun 130023 (P.R. China)*

\*Corresponding author.

Tel: +86-791-8100490.

E-mail: cyclont@yeah.net

---

## Contents

|                                                                                                                                                                                  |     |
|----------------------------------------------------------------------------------------------------------------------------------------------------------------------------------|-----|
| Optimized Cartesian coordinates for both chair and boat forms of (AM-HMHC)-AM' (AM = Li, Na & K; AM' = Be, Mg & Ca) at the $\omega$ B97XD/ma-SVP level.....                      | S3  |
| <b>Table. S1.</b> Electronic first hyperpolarizability tensors ( $\beta_{zzz}^e$ ) at the $\omega$ B97XD method with different basis sets.....                                   | S17 |
| <b>Fig. S1.</b> SOMO and ELF as well as LOL maps for chair forms: (a) $\delta^+$ (Na-HMHC)-AM' $\delta^-$ and (b) $\delta^+$ (K-HMHC)-AM' $\delta^-$ , (AM' = Be, Mg & Ca) ..... | S18 |
| <b>Fig. S2.</b> SOMO and ELF as well as LOL maps for boat forms: (a) $\delta^+$ (Na-HMHC)-AM' $\delta^-$ and (b) $\delta^+$ (K-HMHC)-AM' $\delta^-$ , (AM' = Be, Mg & Ca) .....  | S19 |
| <b>Fig. S3.</b> Electronic absorption spectra of chair forms of $\delta^+$ (Na-HMHC)-AM' $\delta^-$ , (AM' = Be, Mg & Ca). .....                                                 | S20 |
| <b>Fig. S4.</b> Electronic absorption spectra of chair forms of $\delta^+$ (K-HMHC)-AM' $\delta^-$ , (AM' = Be, Mg & Ca). .....                                                  | S21 |
| <b>Fig. S5.</b> Electronic absorption spectra of boat forms of $\delta^+$ (Na-HMHC)-AM' $\delta^-$ , (AM' = Be, Mg & Ca). .....                                                  | S22 |
| <b>Fig. S6.</b> Electronic absorption spectra of boat forms of $\delta^+$ (K-HMHC)-AM' $\delta^-$ , (AM' = Be, Mg & Ca). .....                                                   | S23 |

| Chair (Li-HMHC)-Be |             |             |             | Boat (Li-HMHC)-Be |             |             |             |
|--------------------|-------------|-------------|-------------|-------------------|-------------|-------------|-------------|
| N                  | 1.37369510  | -2.09617415 | -0.28953302 | N                 | -2.84249550 | 0.05536545  | -0.81448615 |
| N                  | 3.48730925  | 0.00021800  | 0.03130300  | N                 | -1.19521060 | 2.27063780  | 0.60607449  |
| N                  | 1.37342910  | 2.09626415  | -0.28952602 | N                 | 1.86982309  | 2.16735840  | 0.32204064  |
| N                  | -1.64374412 | 2.24976316  | 0.40901203  | N                 | 1.75464213  | -0.05913342 | -1.42505134 |
| N                  | -3.20654423 | -0.00009600 | -0.55131604 | N                 | 1.74461236  | -2.25851601 | 0.36421592  |
| N                  | -1.64350112 | -2.24983116 | 0.40885503  | N                 | -1.29681515 | -2.20337393 | 0.58843523  |
| C                  | 0.89140807  | -1.94864314 | -1.65278812 | C                 | -2.81358262 | 0.07386261  | -2.25742781 |
| C                  | 4.26089730  | 0.00036800  | 1.26713409  | C                 | -1.52116066 | 2.01443115  | 1.99637697  |
| C                  | 0.89098006  | 1.94821414  | -1.65267012 | C                 | 3.16401702  | 2.00428182  | 0.96708443  |
| C                  | -0.78461405 | -3.38630225 | 0.17361901  | C                 | -2.47875219 | -2.36166450 | -0.24437151 |
| C                  | 0.69758805  | -3.17250623 | 0.45280503  | C                 | -3.42565012 | -1.16315471 | -0.28868827 |
| C                  | 2.81087120  | -2.36086217 | -0.22893002 | C                 | -3.36433573 | 1.28417183  | -0.25079222 |
| C                  | 3.68703526  | -1.22404109 | -0.73084005 | C                 | -2.37809231 | 2.45123451  | -0.22218180 |
| C                  | 3.68683427  | 1.22439909  | -0.73101105 | C                 | -0.31757519 | 3.42275351  | 0.48511057  |
| C                  | 2.81057020  | 2.36118317  | -0.22919202 | C                 | 1.10988802  | 3.22175083  | 0.98415741  |
| C                  | -1.68699612 | 1.87242514  | 1.80558513  | C                 | 0.35311923  | -0.01093973 | -1.80688787 |
| C                  | -2.78996020 | 0.00010100  | -1.92746114 | C                 | 3.05482297  | -2.15043628 | 0.98705141  |
| C                  | -1.68711312 | -1.87240913 | 1.80539213  | C                 | -1.61537530 | -1.81613478 | 1.94863522  |
| C                  | 0.69725605  | 3.17269723  | 0.45259703  | C                 | 2.00786563  | 2.37336893  | -1.11008942 |
| C                  | -0.78499106 | 3.38627224  | 0.17348501  | C                 | 2.49301553  | 1.12134896  | -1.83354956 |
| C                  | -2.95519721 | 2.44774117  | -0.17437901 | C                 | 2.40509102  | -1.29533035 | -1.81832074 |
| C                  | -3.86012928 | 1.21400709  | -0.12975001 | C                 | 1.84373475  | -2.49701012 | -1.06560272 |
| C                  | -3.85997728 | -1.21440009 | -0.13009001 | C                 | 0.94070325  | -3.25686962 | 1.05971057  |
| C                  | -2.95481021 | -2.44795717 | -0.17481101 | C                 | -0.49290480 | -3.41251134 | 0.56123798  |
| H                  | -0.16950401 | -1.67041812 | -1.63369312 | H                 | -2.31611743 | -0.82401402 | -2.65051105 |
| H                  | 1.02042207  | -2.87051421 | -2.25968016 | H                 | -3.83507852 | 0.11622237  | -2.69991081 |
| H                  | 1.42988910  | -1.13812608 | -2.16105216 | H                 | -2.25164288 | 0.94205039  | -2.62969015 |
| H                  | 5.35198640  | 0.00050600  | 1.05805008  | H                 | -2.06610810 | 2.86723005  | 2.46054148  |
| H                  | 4.01151429  | -0.87496506 | 1.88025513  | H                 | -0.60967229 | 1.81254570  | 2.57563115  |
| H                  | 4.01127729  | 0.87568006  | 1.88019113  | H                 | -2.14112849 | 1.11731817  | 2.09489818  |
| H                  | 1.42943710  | 1.13753008  | -2.16069616 | H                 | 3.80586821  | 2.90299044  | 0.84390784  |
| H                  | 1.01987007  | 2.86986620  | -2.25992216 | H                 | 3.70028692  | 1.13953617  | 0.55153001  |
| H                  | -0.16991001 | 1.66993512  | -1.63332612 | H                 | 3.01814771  | 1.80467411  | 2.03828730  |
| H                  | -0.91301107 | -3.70516927 | -0.87295606 | H                 | -3.08832390 | -3.23397981 | 0.09116209  |
| H                  | -1.08961208 | -4.26471631 | 0.79061606  | H                 | -2.14445242 | -2.60219276 | -1.26811573 |
| H                  | 0.87067706  | -2.99092122 | 1.52575411  | H                 | -4.31659050 | -1.47646640 | -0.87787829 |
| H                  | 1.17998608  | -4.14471230 | 0.21504602  | H                 | -3.80225651 | -0.96736384 | 0.72457691  |
| H                  | 3.06502422  | -3.27937124 | -0.80274706 | H                 | -3.71325603 | 1.08246619  | 0.77119781  |
| H                  | 3.06025322  | -2.57236518 | 0.82251606  | H                 | -4.26342129 | 1.63731885  | -0.80525676 |
| H                  | 4.74418334  | -1.55936411 | -0.69872305 | H                 | -2.04240161 | 2.66540914  | -1.25061492 |
| H                  | 3.46792225  | -1.02460907 | -1.78962213 | H                 | -2.95545487 | 3.34917071  | 0.10226165  |
| H                  | 3.46766725  | 1.02480607  | -1.78975213 | H                 | -0.30468286 | 3.73727159  | -0.56949385 |
| H                  | 4.74394234  | 1.55985911  | -0.69901305 | H                 | -0.72978763 | 4.29551216  | 1.04229674  |
| H                  | 3.06008122  | 2.57294818  | 0.82217106  | H                 | 1.10016383  | 2.98374854  | 2.05855488  |
| H                  | 3.06449822  | 3.27961024  | -0.80324106 | H                 | 1.62924006  | 4.20125058  | 0.88573150  |
| H                  | -0.69040405 | 1.56842311  | 2.16125616  | H                 | -0.12972121 | 0.87792738  | -1.37978282 |
| H                  | -2.06346915 | 2.69633819  | 2.45318317  | H                 | 0.21871195  | -0.01036827 | -2.90950247 |

|    |             |             |             |    |             |             |             |
|----|-------------|-------------|-------------|----|-------------|-------------|-------------|
| H  | -2.33745917 | 1.00280107  | 1.94228214  | H  | -0.19257535 | -0.85842340 | -1.37129986 |
| H  | -3.64738626 | 0.00005600  | -2.64047019 | H  | 3.65116720  | -3.08045642 | 0.86684153  |
| H  | -2.17172016 | 0.88202507  | -2.14173615 | H  | 3.62581450  | -1.31740058 | 0.55327824  |
| H  | -2.17146916 | -0.88160506 | -2.14191615 | H  | 2.93458066  | -1.93123891 | 2.05760824  |
| H  | -2.33743317 | -1.00263807 | 1.94182914  | H  | -2.13197517 | -0.85097276 | 1.96515274  |
| H  | -2.06393215 | -2.69621319 | 2.45292617  | H  | -2.25631541 | -2.56895377 | 2.46082395  |
| H  | -0.69056905 | -1.56859211 | 2.16134015  | H  | -0.69643338 | -1.67128371 | 2.53309729  |
| H  | 0.87044506  | 2.99139822  | 1.52557811  | H  | 1.03399866  | 2.66317140  | -1.52300618 |
| H  | 1.17952109  | 4.14490230  | 0.21457002  | H  | 2.70305736  | 3.20992560  | -1.34140310 |
| H  | -0.91350106 | 3.70491826  | -0.87314306 | H  | 3.55801280  | 0.94869032  | -1.61656272 |
| H  | -1.09002508 | 4.26477831  | 0.79033706  | H  | 2.42387926  | 1.29790833  | -2.92914520 |
| H  | -3.50976825 | 3.28063623  | 0.31916402  | H  | 2.31068194  | -1.48673456 | -2.90942425 |
| H  | -2.81493520 | 2.76368820  | -1.22140209 | H  | 3.48201840  | -1.19291197 | -1.61657984 |
| H  | -4.76677334 | 1.44825410  | -0.73668605 | H  | 2.47303019  | -3.38517586 | -1.29414185 |
| H  | -4.22218030 | 1.06451408  | 0.89904007  | H  | 0.84377452  | -2.72097430 | -1.45670848 |
| H  | -4.22221730 | -1.06518408 | 0.89867307  | H  | 1.41723212  | -4.26077366 | 0.99666635  |
| H  | -4.76648334 | -1.44868110 | -0.73721705 | H  | 0.93964704  | -2.98124407 | 2.12535793  |
| H  | -2.81430520 | -2.76368820 | -1.22186809 | H  | -0.95986330 | -4.21686794 | 1.17515334  |
| H  | -3.50931325 | -3.28104123 | 0.31849302  | H  | -0.49142503 | -3.80244048 | -0.46820825 |
| Li | 1.35363010  | 0.00005200  | 0.71033405  | Li | 1.09937620  | -0.01864663 | 0.74770250  |
| Be | 1.35836810  | -0.00086500 | 3.45771825  | Be | 1.31009423  | 0.00463868  | 3.57806368  |

| Chair (Li-HMHC)-Mg |             |             |             | Boat (Li-HMHC)-Mg |             |             |             |
|--------------------|-------------|-------------|-------------|-------------------|-------------|-------------|-------------|
| N                  | 1.29702616  | -2.09143070 | -0.50834325 | N                 | 2.99098710  | 0.01953861  | -0.68105892 |
| N                  | 3.42953917  | 0.00070917  | -0.29317725 | N                 | 1.20780405  | -2.27005903 | 0.49046715  |
| N                  | 1.29654817  | 2.09247222  | -0.50725755 | N                 | -1.82384906 | -2.08957977 | -0.16464932 |
| N                  | -1.68427471 | 2.25050627  | 0.32832595  | N                 | -1.49548100 | 0.19683474  | -1.80366010 |
| N                  | -3.29064325 | 0.00008247  | -0.56154161 | N                 | -1.70918603 | 2.23945346  | 0.14937904  |
| N                  | -1.68401639 | -2.25075885 | 0.32646238  | N                 | 1.26207239  | 2.15452371  | 0.65176441  |
| C                  | 0.74793591  | -1.93819651 | -1.84618321 | C                 | 3.13468387  | 0.06070248  | -2.11679273 |
| C                  | 4.27676106  | 0.00067707  | 0.89379793  | C                 | 1.41351472  | -2.19564355 | 1.92609409  |
| C                  | 0.74705549  | 1.94007191  | -1.84502934 | C                 | -3.18025282 | -1.95343619 | 0.34909982  |
| C                  | -0.83673404 | -3.38658418 | 0.04880004  | C                 | 2.52915712  | 2.39566867  | -0.02199916 |
| C                  | 0.65702299  | -3.17365780 | 0.25848188  | C                 | 3.50084508  | 1.21694776  | -0.04165504 |
| C                  | 2.73560233  | -2.35902886 | -0.52011999 | C                 | 3.44250104  | -1.23190723 | -0.10575988 |
| C                  | 3.58682990  | -1.22395852 | -1.06622138 | C                 | 2.46062532  | -2.39480789 | -0.24261138 |
| C                  | 3.58642790  | 1.22563519  | -1.06588742 | C                 | 0.32574444  | -3.38084031 | 0.16474855  |
| C                  | 2.73507700  | 2.36036379  | -0.51926011 | C                 | -1.14432421 | -3.18717687 | 0.51988180  |
| C                  | -1.66284636 | 1.87604174  | 1.72579345  | C                 | -0.06729189 | 0.14409002  | -2.06603087 |
| C                  | -2.94592028 | 0.00089321  | -1.95762531 | C                 | -3.08853610 | 2.09643107  | 0.59229204  |
| C                  | -1.66309169 | -1.87732340 | 1.72420761  | C                 | 1.42155791  | 1.57782289  | 1.97184806  |
| C                  | 0.65652294  | 3.17404700  | 0.26043921  | C                 | -1.82178909 | -2.23660328 | -1.61290576 |
| C                  | -0.83733036 | 3.38672337  | 0.05123339  | C                 | -2.21378395 | -0.94892881 | -2.32941112 |
| C                  | -3.02168679 | 2.44770857  | -0.19404133 | C                 | -2.09197889 | 1.46765624  | -2.17227890 |
| C                  | -3.92314621 | 1.21386862  | -0.10740948 | C                 | -1.62303171 | 2.59461462  | -1.25838957 |
| C                  | -3.92301226 | -1.21430850 | -0.10883249 | C                 | -1.00370978 | 3.17609008  | 1.01829686  |
| C                  | -3.02122817 | -2.44784252 | -0.19645338 | C                 | 0.47445555  | 3.37349247  | 0.69755899  |

|    |             |             |             |    |             |             |             |
|----|-------------|-------------|-------------|----|-------------|-------------|-------------|
| H  | -0.31100889 | -1.66162088 | -1.77248157 | H  | 2.69035936  | 0.97894793  | -2.52661934 |
| H  | 0.84766852  | -2.85741317 | -2.46203964 | H  | 4.20121190  | 0.02874377  | -2.43616390 |
| H  | 1.25979014  | -1.12534048 | -2.37748630 | H  | 2.61862490  | -0.78608728 | -2.59107967 |
| H  | 5.35313774  | 0.00101488  | 0.61900018  | H  | 1.88237802  | -3.12185240 | 2.32649400  |
| H  | 4.06454626  | -0.87566295 | 1.51981406  | H  | 0.45850185  | -2.03188226 | 2.44478915  |
| H  | 4.06406285  | 0.87661863  | 1.52020738  | H  | 2.05292999  | -1.34807836 | 2.19482020  |
| H  | 1.25887715  | 1.12769428  | -2.37708681 | H  | -3.79833211 | -2.84948289 | 0.12842920  |
| H  | 0.84641168  | 2.85975287  | -2.46025042 | H  | -3.67695678 | -1.07623619 | -0.08806782 |
| H  | -0.31181906 | 1.66326623  | -1.77116748 | H  | -3.14673629 | -1.79333343 | 1.43699719  |
| H  | -1.01382998 | -3.70222134 | -0.99156632 | H  | 3.07605608  | 3.24521557  | 0.45043053  |
| H  | -1.11240240 | -4.26676798 | 0.67667599  | H  | 2.31089995  | 2.71284796  | -1.05676164 |
| H  | 0.88255212  | -2.99925182 | 1.32311713  | H  | 4.43491959  | 1.57405184  | -0.52893687 |
| H  | 1.12798652  | -4.14346191 | -0.00897272 | H  | 3.78784745  | 0.97508445  | 0.99075772  |
| H  | 2.95828286  | -3.27798838 | -1.10562806 | H  | 3.66534295  | -1.07018969 | 0.95783959  |
| H  | 3.03660682  | -2.56993795 | 0.51809466  | H  | 4.40224783  | -1.56588063 | -0.56116394 |
| H  | 4.64339305  | -1.56071531 | -1.08897628 | H  | 2.21734040  | -2.53225548 | -1.30895533 |
| H  | 3.31351629  | -1.02324723 | -2.11200283 | H  | 3.00633979  | -3.31732019 | 0.06549280  |
| H  | 3.31293252  | 1.02517203  | -2.11166691 | H  | 0.42540944  | -3.59773769 | -0.90915714 |
| H  | 4.64292227  | 1.56261125  | -1.08876466 | H  | 0.65800020  | -4.31112955 | 0.67909789  |
| H  | 3.03625688  | 2.57095340  | 0.51896619  | H  | -1.24816169 | -3.00686072 | 1.60109425  |
| H  | 2.95745085  | 3.27957960  | -1.10447985 | H  | -1.65953315 | -4.15133409 | 0.31414053  |
| H  | -0.64859530 | 1.57618361  | 2.03458634  | H  | 0.36828696  | -0.76806817 | -1.63694206 |
| H  | -2.00983881 | 2.69981710  | 2.38961173  | H  | 0.16327819  | 0.18497007  | -3.15172386 |
| H  | -2.30304020 | 1.00445050  | 1.89503563  | H  | 0.44510973  | 0.96683568  | -1.55059647 |
| H  | -3.83916760 | 0.00116351  | -2.62504014 | H  | -3.65905102 | 3.04438525  | 0.49069339  |
| H  | -2.33975416 | 0.88280969  | -2.20397612 | H  | -3.60639066 | 1.31956575  | 0.01263272  |
| H  | -2.33955417 | -0.88061377 | -2.20495859 | H  | -3.09746288 | 1.77084764  | 1.64373845  |
| H  | -2.30344938 | -1.00593721 | 1.89388076  | H  | 1.91651814  | 0.60396241  | 1.90480357  |
| H  | -2.01014515 | -2.70162363 | 2.38732975  | H  | 2.01005893  | 2.23220308  | 2.65383731  |
| H  | -0.64898700 | -1.57754545 | 2.03351724  | H  | 0.43817354  | 1.38087982  | 2.42640374  |
| H  | 0.88236334  | 2.99895461  | 1.32489698  | H  | -0.81698310 | -2.52879330 | -1.94052304 |
| H  | 1.12718917  | 4.14413408  | -0.00651893 | H  | -2.50252855 | -3.05080453 | -1.94276475 |
| H  | -1.01472781 | 3.70298902  | -0.98889337 | H  | -3.29092375 | -0.76145559 | -2.20620980 |
| H  | -1.11307519 | 4.26643257  | 0.67974702  | H  | -2.04425876 | -1.08521765 | -3.41948379 |
| H  | -3.55283651 | 3.28056325  | 0.32427084  | H  | -1.86563002 | 1.74608909  | -3.22397260 |
| H  | -2.92981354 | 2.76334269  | -1.24643307 | H  | -3.18530330 | 1.36244475  | -2.11130142 |
| H  | -4.85780548 | 1.44872414  | -0.66973451 | H  | -2.21008210 | 3.50990459  | -1.48953837 |
| H  | -4.23554055 | 1.06313421  | 0.93729371  | H  | -0.57860026 | 2.82898915  | -1.49783399 |
| H  | -4.23574462 | -1.06472510 | 0.93593250  | H  | -1.48296275 | 4.17964428  | 0.98879364  |
| H  | -4.85745617 | -1.44878347 | -0.67166787 | H  | -1.12111886 | 2.80272426  | 2.04803758  |
| H  | -2.92898426 | -2.76242464 | -1.24913046 | H  | 0.87768981  | 4.08388080  | 1.45517044  |
| H  | -3.55229330 | -3.28133937 | 0.32091222  | H  | 0.58392213  | 3.89077931  | -0.26815928 |
| Li | 1.33321518  | 0.00039980  | 0.47997878  | Li | -1.06304108 | 0.03426344  | 0.41056713  |
| Mg | 1.49496556  | -0.00464872 | 3.72505627  | Mg | -1.69567164 | -0.49765022 | 3.82267910  |

| Chair (Li-HMHC)-Ca |            |             |             | Boat (Li-HMHC)-Ca |            |            |            |
|--------------------|------------|-------------|-------------|-------------------|------------|------------|------------|
| N                  | 1.17389062 | -2.08486062 | -0.79754257 | N                 | 3.19071525 | 0.08428375 | 0.06965702 |

|   |             |             |             |   |             |             |             |
|---|-------------|-------------|-------------|---|-------------|-------------|-------------|
| N | 3.32587405  | 0.00181371  | -0.76420174 | N | 1.18219468  | -2.24704040 | 0.61881393  |
| N | 1.17276243  | 2.08743833  | -0.79421074 | N | -1.51729013 | -2.09871618 | -0.92298750 |
| N | -1.73044522 | 2.24986091  | 0.27609460  | N | -0.75566195 | 0.21298911  | -2.35837692 |
| N | -3.40611198 | -0.00002284 | -0.47435361 | N | -1.59631948 | 2.19593635  | -0.51203873 |
| N | -1.72955426 | -2.25066527 | 0.27170231  | N | 1.08384672  | 2.14985653  | 0.82191367  |
| C | 0.51469506  | -1.92295486 | -2.08411197 | C | 3.76250345  | 0.14523991  | -1.25438359 |
| C | 4.28225440  | 0.00138453  | 0.33658697  | C | 0.91739203  | -2.20179633 | 2.04665487  |
| C | 0.51330829  | 1.92781038  | -2.08093425 | C | -2.96680972 | -1.98533433 | -0.81711529 |
| C | -0.90800073 | -3.38558165 | -0.07774415 | C | 2.48975822  | 2.43943154  | 0.58021503  |
| C | 0.59804409  | -3.17367786 | 0.01056393  | C | 3.45454894  | 1.28390791  | 0.84088179  |
| C | 2.60605855  | -2.35590579 | -0.93268022 | C | 3.47223493  | -1.16436297 | 0.75001542  |
| C | 3.41041214  | -1.22290966 | -1.54932852 | C | 2.60437695  | -2.34490150 | 0.31609396  |
| C | 3.40954341  | 1.22764650  | -1.54767425 | C | 0.46660744  | -3.35792177 | 0.00913869  |
| C | 2.60477650  | 2.35937019  | -0.92922974 | C | -1.04664243 | -3.20137414 | -0.08757015 |
| C | -1.58807596 | 1.87229135  | 1.66503399  | C | 0.68777362  | 0.17585908  | -2.19203662 |
| C | -3.18200585 | 0.00153750  | -1.89494080 | C | -3.04267718 | 2.02482484  | -0.51842342 |
| C | -1.58761322 | -1.87572700 | 1.66139190  | C | 0.84452381  | 1.49499395  | 2.09188666  |
| C | 0.59666823  | 3.17443360  | 0.01617979  | C | -1.09724614 | -2.22401870 | -2.31178764 |
| C | -0.90949016 | 3.38583362  | -0.07132411 | C | -1.27472688 | -0.92622990 | -3.09214914 |
| C | -3.10775205 | 2.44755521  | -0.12953537 | C | -1.23576311 | 1.48814834  | -2.85951012 |
| C | -3.99831662 | 1.21334404  | 0.03248123  | C | -1.08831294 | 2.59104886  | -1.81760025 |
| C | -3.99784926 | -1.21471605 | 0.02986765  | C | -1.21207617 | 3.12561049  | 0.54649358  |
| C | -3.10669487 | -2.44818537 | -0.13457351 | C | 0.28896704  | 3.35746077  | 0.68853136  |
| H | -0.53324291 | -1.64312625 | -1.92042112 | H | 3.44441347  | 1.06038173  | -1.77394791 |
| H | 0.55937762  | -2.83959974 | -2.70993442 | H | 4.87600328  | 0.13651934  | -1.23521954 |
| H | 0.98292690  | -1.10967127 | -2.65317680 | H | 3.43284897  | -0.70509388 | -1.86812026 |
| H | 5.32789804  | 0.00215613  | -0.03881158 | H | 1.17076621  | -3.16273581 | 2.54690368  |
| H | 4.12992321  | -0.87530467 | 0.97973810  | H | -0.14251113 | -1.96913587 | 2.23422183  |
| H | 4.12912047  | 0.87688881  | 0.98115973  | H | 1.49449930  | -1.40881278 | 2.53420819  |
| H | 0.98178778  | 1.11591355  | -2.65177038 | H | -3.48166759 | -2.89559880 | -1.19120843 |
| H | 0.55740149  | 2.84574879  | -2.70489773 | H | -3.33294189 | -1.12331814 | -1.39177076 |
| H | -0.53445618 | 1.64716221  | -1.91754506 | H | -3.24240841 | -1.80952462 | 0.23473767  |
| H | -1.16978976 | -3.69754508 | -1.10117861 | H | 2.83754486  | 3.28576346  | 1.21740397  |
| H | -1.13168036 | -4.26783629 | 0.56767783  | H | 2.59311573  | 2.78295679  | -0.46421004 |
| H | 0.91099078  | -3.00841095 | 1.05460439  | H | 4.48134801  | 1.67006106  | 0.65790622  |
| H | 1.04499667  | -4.14099750 | -0.30263980 | H | 3.42665746  | 1.03332422  | 1.91012230  |
| H | 2.77494455  | -3.27477813 | -1.53588634 | H | 3.35758891  | -1.00856483 | 1.83155725  |
| H | 2.99406281  | -2.56826141 | 0.07618660  | H | 4.53194833  | -1.47553028 | 0.60813069  |
| H | 4.45972733  | -1.56313327 | -1.66372781 | H | 2.70867313  | -2.48056815 | -0.77276418 |
| H | 3.04882147  | -1.02000097 | -2.56742497 | H | 3.04432051  | -3.25916808 | 0.77841682  |
| H | 3.04772477  | 1.02592779  | -2.56592637 | H | 0.88983644  | -3.53377280 | -0.99087172 |
| H | 4.45865038  | 1.56857385  | -1.66193817 | H | 0.65378395  | -4.30091717 | 0.57187830  |
| H | 2.99288349  | 2.57042660  | 0.07986471  | H | -1.47334380 | -3.04734597 | 0.91575700  |
| H | 2.77310084  | 3.27921832  | -1.53110092 | H | -1.45343425 | -4.16845309 | -0.45701280 |
| H | -0.55142960 | 1.56761176  | 1.88333003  | H | 0.98987397  | -0.74076777 | -1.66778069 |
| H | -1.86944633 | 2.69596400  | 2.35949447  | H | 1.22554677  | 0.23745659  | -3.16165965 |
| H | -2.21527034 | 1.00365404  | 1.88943752  | H | 1.01526399  | 0.99393705  | -1.53725362 |
| H | -4.12901918 | 0.00203671  | -2.48342554 | H | -3.57280059 | 2.96767469  | -0.77094095 |

|    |             |             |             |    |             |             |             |
|----|-------------|-------------|-------------|----|-------------|-------------|-------------|
| H  | -2.59921373 | 0.88363888  | -2.19193378 | H  | -3.34228675 | 1.25648571  | -1.24463286 |
| H  | -2.59898066 | -0.87977606 | -2.19380962 | H  | -3.36963031 | 1.67354921  | 0.47262314  |
| H  | -2.21530340 | -1.00786285 | 1.88738983  | H  | 1.36034779  | 0.53077666  | 2.12499846  |
| H  | -1.86862422 | -2.70089187 | 2.35421756  | H  | 1.17243034  | 2.10862640  | 2.96055988  |
| H  | -0.55116166 | -1.57090604 | 1.88040214  | H  | -0.22672566 | 1.26555873  | 2.21147652  |
| H  | 0.90996083  | 3.00724128  | 1.05980817  | H  | -0.03890588 | -2.50947354 | -2.34039406 |
| H  | 1.04311632  | 4.14255730  | -0.29525735 | H  | -1.64915535 | -3.03476537 | -2.83374214 |
| H  | -1.17165934 | 3.69966020  | -1.09409108 | H  | -2.34229755 | -0.74701147 | -3.28834340 |
| H  | -1.13341713 | 4.26673093  | 0.57586580  | H  | -0.79037277 | -1.04079473 | -4.08581014 |
| H  | -3.59259998 | 3.27982906  | 0.43302676  | H  | -0.70552948 | 1.80004518  | -3.78459599 |
| H  | -3.10602782 | 2.76434442  | -1.18555737 | H  | -2.29344141 | 1.37007743  | -3.13731692 |
| H  | -4.97731860 | 1.44817937  | -0.44834874 | H  | -1.59127748 | 3.50814750  | -2.19342288 |
| H  | -4.22104087 | 1.06180909  | 1.09984105  | H  | -0.02475018 | 2.83959659  | -1.71802494 |
| H  | -4.22079114 | -1.06550746 | 1.09750866  | H  | -1.68554371 | 4.11965658  | 0.39002835  |
| H  | -4.97668105 | -1.44898105 | -0.45158370 | H  | -1.62706037 | 2.72836475  | 1.48676698  |
| H  | -3.10464269 | -2.76277324 | -1.19125407 | H  | 0.43166088  | 4.03231665  | 1.56309326  |
| H  | -3.59124344 | -3.28185190 | 0.42617984  | H  | 0.66595973  | 3.92360725  | -0.17731460 |
| Li | 1.30633607  | 0.00054429  | 0.19821850  | Li | -0.99968983 | 0.00456062  | -0.13466538 |
| Ca | 1.82359675  | -0.00619658 | 3.99193317  | Ca | -2.88391324 | -0.36609464 | 3.68523415  |

| Chair (Na-HMHC)-Be |             |             |             | Boat (Na-HMHC)-Be |             |             |             |
|--------------------|-------------|-------------|-------------|-------------------|-------------|-------------|-------------|
| N                  | 1.30080669  | -2.39573574 | -0.37414079 | N                 | -2.75296203 | -0.43171361 | -0.89453352 |
| N                  | 3.18331698  | -0.00046971 | 0.06825394  | N                 | -1.62128137 | 2.05995446  | 0.54419892  |
| N                  | 1.30159006  | 2.39540444  | -0.37408095 | N                 | 1.39751651  | 2.43904626  | 0.32737989  |
| N                  | -1.60598455 | 2.38831647  | 0.42305944  | N                 | 1.81905439  | 0.24685455  | -1.52359438 |
| N                  | -2.89497768 | 0.00036739  | -0.58836648 | N                 | 2.08212810  | -1.91738081 | 0.37260499  |
| N                  | -1.60675732 | -2.38784323 | 0.42311809  | N                 | -0.93359844 | -2.43853930 | 0.58976880  |
| C                  | 0.95374513  | -2.57890681 | -1.77062362 | C                 | -2.68978516 | -0.45782645 | -2.33923323 |
| C                  | 3.84285922  | -0.00057752 | 1.36664506  | C                 | -2.02579578 | 1.79856723  | 1.91673842  |
| C                  | 0.95461508  | 2.57873196  | -1.77055970 | C                 | 2.66293727  | 2.40148827  | 1.03896638  |
| C                  | -0.81220432 | -3.59576052 | 0.28989166  | C                 | -2.05154348 | -2.75415734 | -0.28886077 |
| C                  | 0.67889152  | -3.38949248 | 0.50398197  | C                 | -3.16183686 | -1.71104243 | -0.34542252 |
| C                  | 2.74549556  | -2.43392230 | -0.16849607 | C                 | -3.52003882 | 0.70010569  | -0.40709217 |
| C                  | 3.49095032  | -1.20978881 | -0.67819290 | C                 | -2.74876491 | 2.01444181  | -0.37650138 |
| C                  | 3.49133933  | 1.20876743  | -0.67816157 | C                 | -0.94424425 | 3.34665327  | 0.43523265  |
| C                  | 2.74628830  | 2.43311981  | -0.16840981 | C                 | 0.48401014  | 3.37565693  | 0.96600215  |
| C                  | -1.82573639 | 2.03844904  | 1.81507516  | C                 | 0.51152205  | 0.00508549  | -2.08834055 |
| C                  | -2.22001630 | 0.00018729  | -1.86274056 | C                 | 3.23418368  | -1.47287827 | 1.13760386  |
| C                  | -1.82635967 | -2.03784993 | 1.81512454  | C                 | -1.34939332 | -2.28941797 | 1.97574087  |
| C                  | 0.67994036  | 3.38933477  | 0.50402131  | C                 | 1.56986296  | 2.67852796  | -1.09349199 |
| C                  | -0.81107796 | 3.59600472  | 0.28980894  | C                 | 2.33672850  | 1.56836058  | -1.81181506 |
| C                  | -2.83839581 | 2.48004711  | -0.33571343 | C                 | 2.75992052  | -0.82707823 | -1.76346035 |
| C                  | -3.66504155 | 1.19840981  | -0.33575147 | C                 | 2.39153395  | -2.11763900 | -1.03073694 |
| C                  | -3.66545789 | -1.19738481 | -0.33567035 | C                 | 1.46967490  | -3.07666668 | 1.00300917  |
| C                  | -2.83922625 | -2.47927599 | -0.33558822 | C                 | 0.09849981  | -3.45905242 | 0.45840286  |
| H                  | -0.12307639 | -2.43254598 | -1.92311272 | H                 | -2.02005701 | -1.25426360 | -2.69171848 |
| H                  | 1.22532323  | -3.58875293 | -2.14980473 | H                 | -3.68954176 | -0.62805712 | -2.79846867 |

|    |             |             |             |    |             |             |             |
|----|-------------|-------------|-------------|----|-------------|-------------|-------------|
| H  | 1.46976786  | -1.83750595 | -2.39574592 | H  | -2.29857689 | 0.49014388  | -2.73346772 |
| H  | 4.94940504  | -0.00075019 | 1.25771848  | H  | -2.84126361 | 2.47905356  | 2.24693795  |
| H  | 3.54068714  | -0.87496867 | 1.95795446  | H  | -1.17447489 | 1.91554621  | 2.60090533  |
| H  | 3.54096206  | 0.87390873  | 1.95795566  | H  | -2.36564157 | 0.76158718  | 2.03767670  |
| H  | 1.47039564  | 1.83716938  | -2.39569110 | H  | 3.21486269  | 3.36383135  | 0.96492004  |
| H  | 1.22654547  | 3.58849532  | -2.14970711 | H  | 3.30621912  | 1.60425444  | 0.64476062  |
| H  | -0.12225568 | 2.43275146  | -1.92306314 | H  | 2.48379641  | 2.17574724  | 2.10076713  |
| H  | -0.98463791 | -4.01878747 | -0.71150070 | H  | -2.52332769 | -3.71974059 | 0.00684458  |
| H  | -1.14564016 | -4.38120507 | 1.00281442  | H  | -1.65178116 | -2.91170795 | -1.30371767 |
| H  | 0.87667302  | -3.07535036 | 1.54357932  | H  | -4.00064069 | -2.15440802 | -0.92744108 |
| H  | 1.16307526  | -4.38230053 | 0.36722169  | H  | -3.55986909 | -1.54996715 | 0.66571500  |
| H  | 3.18271286  | -3.33820992 | -0.64719498 | H  | -3.88499004 | 0.47247869  | 0.60378427  |
| H  | 2.92308197  | -2.54132005 | 0.91130798  | H  | -4.43283779 | 0.86642516  | -1.02118967 |
| H  | 4.58014811  | -1.43386123 | -0.65232872 | H  | -2.37291553 | 2.23938795  | -1.38809421 |
| H  | 3.24573546  | -1.03962405 | -1.73733107 | H  | -3.48359091 | 2.81745268  | -0.13583328 |
| H  | 3.24606022  | 1.03871844  | -1.73730504 | H  | -0.95351847 | 3.64872641  | -0.62265716 |
| H  | 4.58060866  | 1.43248979  | -0.65229405 | H  | -1.51260538 | 4.13923453  | 0.97034900  |
| H  | 2.92391028  | 2.54040984  | 0.91139971  | H  | 0.48615977  | 3.14787122  | 2.04359716  |
| H  | 3.18380454  | 3.33728263  | -0.64707039 | H  | 0.85007880  | 4.42313545  | 0.87106283  |
| H  | -0.86905618 | 1.97139180  | 2.35859497  | H  | -0.19304888 | 0.78459386  | -1.76758420 |
| H  | -2.47081910 | 2.78044953  | 2.33587687  | H  | 0.51919954  | -0.02781006 | -3.20071950 |
| H  | -2.29937393 | 1.05163120  | 1.89121081  | H  | 0.10007620  | -0.94267155 | -1.71353394 |
| H  | -2.92101666 | 0.00027126  | -2.72844962 | H  | 4.03883686  | -2.23957211 | 1.16875746  |
| H  | -1.57264097 | 0.88235485  | -1.94742711 | H  | 3.65306327  | -0.55407256 | 0.70785968  |
| H  | -1.57293604 | -0.88220881 | -1.94735754 | H  | 2.91734980  | -1.22952778 | 2.16350759  |
| H  | -2.29968492 | -1.05088000 | 1.89123768  | H  | -2.07044619 | -1.46899824 | 2.08116950  |
| H  | -2.47166341 | -2.77962956 | 2.33596758  | H  | -1.81477733 | -3.21844337 | 2.37354189  |
| H  | -0.86964340 | -1.97108173 | 2.35861702  | H  | -0.49441632 | -2.00803409 | 2.60805621  |
| H  | 0.87756275  | 3.07514091  | 1.54363309  | H  | 0.57940397  | 2.78099105  | -1.55696413 |
| H  | 1.16441647  | 4.38200287  | 0.36728173  | H  | 2.09924296  | 3.63931608  | -1.28705618 |
| H  | -0.98331179 | 4.01901094  | -0.71162928 | H  | 3.39340576  | 1.59392661  | -1.50816935 |
| H  | -1.14433312 | 4.38159291  | 1.00265740  | H  | 2.32660230  | 1.79558067  | -2.90144734 |
| H  | -3.49758649 | 3.29537090  | 0.04208212  | H  | 2.86006302  | -1.06587531 | -2.84632154 |
| H  | -2.58308979 | 2.75631748  | -1.37203735 | H  | 3.75336062  | -0.48726810 | -1.43571212 |
| H  | -4.48833123 | 1.33151368  | -1.07598640 | H  | 3.22767684  | -2.84007171 | -1.16862627 |
| H  | -4.15656778 | 1.08015901  | 0.64261564  | H  | 1.52042895  | -2.56924495 | -1.52423977 |
| H  | -4.15691732 | -1.07891319 | 0.64270363  | H  | 2.12317840  | -3.97441921 | 0.91804586  |
| H  | -4.48880470 | -1.33026238 | -1.07588223 | H  | 1.39048598  | -2.85353900 | 2.07790353  |
| H  | -2.58404275 | -2.75568398 | -1.37190637 | H  | -0.20946183 | -4.39863906 | 0.96997051  |
| H  | -3.49865244 | -3.29437311 | 0.04228673  | H  | 0.18227831  | -3.72219857 | -0.60677722 |
| Na | 0.48529423  | -0.00003772 | 0.45381993  | Na | 0.42967727  | 0.05574521  | 0.78445377  |
| Be | 1.09133956  | -0.00015922 | 3.42083522  | Be | 0.92368399  | 0.50493179  | 3.86334843  |

| Chair (Na-HMHC)-Mg |             |             |             | Boat (Na-HMHC)-Mg |             |             |             |
|--------------------|-------------|-------------|-------------|-------------------|-------------|-------------|-------------|
| N                  | -1.13310308 | 2.52018418  | -0.48897104 | N                 | 2.87951509  | -0.46952642 | -0.76963535 |
| N                  | -3.12725722 | 0.18030101  | -0.24306802 | N                 | 0.83185619  | -2.48932439 | 0.37396853  |
| N                  | -1.30953609 | -2.25898016 | -0.68782605 | N                 | -2.08681849 | -1.80417833 | -0.14885852 |



|   |             |             |             |   |             |             |             |
|---|-------------|-------------|-------------|---|-------------|-------------|-------------|
| N | 1.57699711  | -2.46459918 | 0.18724401  | N | -1.53486134 | 0.47941707  | -1.86608122 |
| N | 2.96918221  | -0.03114800 | -0.57366204 | N | -1.29223646 | 2.51831571  | 0.17795841  |
| N | 1.70961412  | 2.35239617  | 0.51418804  | N | 1.67749841  | 1.97212595  | 0.69811496  |
| C | -0.67059005 | 2.75238720  | -1.84370913 | C | 3.00192557  | -0.36954112 | -2.20782610 |
| C | -3.83588628 | 0.20568201  | 1.02736807  | C | 1.14716139  | -2.44616882 | 1.79328370  |
| C | -0.92061907 | -2.29719916 | -2.08416615 | C | -3.35062731 | -1.37845286 | 0.42708277  |
| C | 0.96927507  | 3.59500426  | 0.39427003  | C | 2.92339072  | 1.92659366  | -0.05603553 |
| C | -0.54215204 | 3.44011625  | 0.48307503  | C | 3.62507630  | 0.57399177  | -0.08970776 |
| C | -2.58735719 | 2.60196219  | -0.40001603 | C | 3.16647709  | -1.81184197 | -0.29607864 |
| C | -3.32796124 | 1.41009810  | -0.98989007 | C | 2.00485717  | -2.78821397 | -0.43682051 |
| C | -3.46795425 | -1.00707807 | -1.01012207 | C | -0.21818464 | -3.46567307 | 0.10544662  |
| C | -2.75987720 | -2.26352416 | -0.52374304 | C | -1.62439128 | -3.02672928 | 0.49457183  |
| C | 1.76746313  | -2.27201516 | 1.61192311  | C | -0.17408713 | 0.30077148  | -2.31867700 |
| C | 2.36619517  | 0.09463601  | -1.87774713 | C | -2.60655426 | 2.46829791  | 0.79528763  |
| C | 1.82190813  | 1.91523814  | 1.89330014  | C | 1.87205485  | 1.63125028  | 2.09899264  |
| C | -0.75236306 | -3.36704424 | 0.08958001  | C | -2.15055185 | -1.90905063 | -1.59611337 |
| C | 0.73769105  | -3.61395126 | -0.09770401 | C | -2.42612945 | -0.57915809 | -2.29564230 |
| C | 2.83120320  | -2.52191018 | -0.53742904 | C | -2.04586754 | 1.81591771  | -2.09188456 |
| C | 3.69119226  | -1.27107509 | -0.38703803 | C | -1.35575955 | 2.87153511  | -1.22855234 |
| C | 3.76417127  | 1.11392208  | -0.18714501 | C | -0.40234064 | 3.37424788  | 0.94863127  |
| C | 2.99294322  | 2.42976118  | -0.15729601 | C | 1.06886927  | 3.28991421  | 0.56046894  |
| H | 0.40875703  | 2.57238919  | -1.92001314 | H | 2.68319060  | 0.61965495  | -2.56415825 |
| H | -0.87723707 | 3.78760627  | -2.19439816 | H | 4.04855550  | -0.53162924 | -2.55014514 |
| H | -1.16143008 | 2.05938215  | -2.54032018 | H | 2.36792369  | -1.11299123 | -2.71027330 |
| H | -4.92583136 | 0.37030003  | 0.88060107  | H | 1.64981827  | -3.37627796 | 2.13753579  |
| H | -3.43681125 | 0.98647207  | 1.68840912  | H | 0.23318041  | -2.30776344 | 2.38705933  |
| H | -3.69938627 | -0.73940106 | 1.56888611  | H | 1.79352331  | -1.59102079 | 2.03068377  |
| H | -1.35528010 | -1.44805710 | -2.62869219 | H | -4.17565897 | -2.08814021 | 0.20117302  |
| H | -1.24405809 | -3.23077923 | -2.59549319 | H | -3.63520630 | -0.38647685 | 0.05333890  |
| H | 0.16881301  | -2.21186016 | -2.18022016 | H | -3.24958864 | -1.29373295 | 1.51935031  |
| H | 1.22986309  | 4.06593329  | -0.56555704 | H | 3.65333825  | 2.66507924  | 0.34847923  |
| H | 1.27480009  | 4.32752631  | 1.17321908  | H | 2.70808092  | 2.24814482  | -1.08796487 |
| H | -0.82827006 | 3.08282522  | 1.48683311  | H | 4.62238497  | 0.73140780  | -0.55751348 |
| H | -0.97494707 | 4.45922932  | 0.36876503  | H | 3.83220182  | 0.24751208  | 0.93848600  |
| H | -2.95656921 | 3.52658525  | -0.89619606 | H | 3.46760794  | -1.75924484 | 0.75910808  |
| H | -2.85433721 | 2.70080820  | 0.66174405  | H | 4.03656987  | -2.25301414 | -0.83064852 |
| H | -4.40727732 | 1.67472412  | -1.05116407 | H | 1.68899083  | -2.82864156 | -1.49207590 |
| H | -2.99837222 | 1.24669709  | -2.02700714 | H | 2.39943001  | -3.80191169 | -0.19444686 |
| H | -3.22206623 | -0.82604606 | -2.06678715 | H | -0.18928814 | -3.71269705 | -0.96613649 |
| H | -4.56199033 | -1.20315209 | -0.98762507 | H | -0.01215136 | -4.42320995 | 0.63195283  |
| H | -2.97158322 | -2.40924317 | 0.54648104  | H | -1.67755048 | -2.86422970 | 1.58316760  |
| H | -3.20782623 | -3.13736322 | -1.04787407 | H | -2.30830654 | -3.87813665 | 0.27865582  |
| H | 0.79996406  | -2.26896116 | 2.13319815  | H | 0.20428160  | -0.68394383 | -2.01228302 |
| H | 2.40041117  | -3.06892522 | 2.06143515  | H | -0.06976771 | 0.39032113  | -3.42282653 |
| H | 2.22968216  | -1.29713309 | 1.81294613  | H | 0.48856423  | 1.03805791  | -1.84435425 |
| H | 3.11448022  | 0.14466801  | -2.70142320 | H | -3.10433578 | 3.46247590  | 0.80353021  |
| H | 1.70181912  | -0.75671505 | -2.07131215 | H | -3.25846584 | 1.76339704  | 0.26362723  |
| H | 1.74682413  | 0.99878607  | -1.92167414 | H | -2.50930114 | 2.09826835  | 1.82841325  |

|    |             |             |             |    |             |             |             |
|----|-------------|-------------|-------------|----|-------------|-------------|-------------|
| H  | 2.25150316  | 0.90655907  | 1.94161014  | H  | 2.25159323  | 0.60687269  | 2.20391214  |
| H  | 2.45257918  | 2.60189319  | 2.50126518  | H  | 2.58495340  | 2.32195343  | 2.60171937  |
| H  | 0.82854206  | 1.84119613  | 2.36183217  | H  | 0.91284630  | 1.64477429  | 2.63865979  |
| H  | -0.97719907 | -3.17271723 | 1.15174908  | H  | -1.19607896 | -2.30962254 | -1.96306136 |
| H  | -1.26753809 | -4.31904731 | -0.16901001 | H  | -2.93195787 | -2.63367898 | -1.91944550 |
| H  | 0.92623907  | -3.93581028 | -1.13301108 | H  | -3.45845214 | -0.26104960 | -2.09046000 |
| H  | 1.01071007  | -4.48597032 | 0.53572104  | H  | -2.37282733 | -0.75254660 | -3.39353306 |
| H  | 3.45517325  | -3.38842124 | -0.21806202 | H  | -1.95021179 | 2.12837927  | -3.15596404 |
| H  | 2.60559619  | -2.69142120 | -1.60287911 | H  | -3.12389048 | 1.80861050  | -1.87448274 |
| H  | 4.54624632  | -1.36711810 | -1.09636808 | H  | -1.88295424 | 3.83964052  | -1.38463201 |
| H  | 4.13728430  | -1.25193009 | 0.61967805  | H  | -0.33414487 | 3.02267326  | -1.60220384 |
| H  | 4.18239230  | 0.91026206  | 0.81121306  | H  | -0.70574093 | 4.44293661  | 0.87300235  |
| H  | 4.64142734  | 1.26052209  | -0.86000406 | H  | -0.52283141 | 3.09302453  | 2.00644509  |
| H  | 2.81880320  | 2.77847720  | -1.18841608 | H  | 1.61586648  | 4.04136759  | 1.17268917  |
| H  | 3.66030226  | 3.18932523  | 0.31113602  | H  | 1.19792718  | 3.61593227  | -0.48247627 |
| Na | -0.45212803 | 0.06095300  | 0.36914103  | Na | -0.42691334 | 0.08456341  | 0.54261511  |
| Mg | -1.41297910 | -0.89247706 | 3.63415226  | Mg | -1.59438810 | -0.51872254 | 3.99770820  |

| Chair (Na-HMHC)-Ca |             |             |             | Boat (Na-HMHC)-Ca |             |             |             |
|--------------------|-------------|-------------|-------------|-------------------|-------------|-------------|-------------|
| N                  | 1.13858608  | -2.33540717 | -0.90355107 | N                 | 3.12186733  | -0.13423061 | 0.07988744  |
| N                  | 3.09847622  | 0.00173100  | -0.70224105 | N                 | 1.04017479  | -2.34907774 | 0.61443393  |
| N                  | 1.13678608  | 2.33750917  | -0.90112107 | N                 | -1.59518952 | -2.08420299 | -0.89016607 |
| N                  | -1.66264312 | 2.40635517  | 0.23091202  | N                 | -0.74146956 | 0.17880156  | -2.49422466 |
| N                  | -3.13788823 | -0.00063200 | -0.49399104 | N                 | -1.42179143 | 2.31220810  | -0.65424319 |
| N                  | -1.66088912 | -2.40728217 | 0.22853202  | N                 | 1.22683381  | 2.18034176  | 0.87001365  |
| C                  | 0.58479004  | -2.30282416 | -2.24322916 | C                 | 3.71039963  | -0.08000417 | -1.24069752 |
| C                  | 3.87802728  | 0.00152400  | 0.52607704  | C                 | 0.81947565  | -2.19230523 | 2.04314723  |
| C                  | 0.58287804  | 2.30535517  | -2.24075816 | C                 | -3.01412209 | -1.79591355 | -0.76794379 |
| C                  | -0.90657406 | -3.59607726 | -0.11673101 | C                 | 2.64987075  | 2.27191658  | 0.56785403  |
| C                  | 0.60653804  | -3.42653525 | -0.08747701 | C                 | 3.47297471  | 1.02694812  | 0.87700885  |
| C                  | 2.59462119  | -2.42702018 | -0.90967006 | C                 | 3.37657921  | -1.40557779 | 0.73265065  |
| C                  | 3.31777324  | -1.21097009 | -1.47231411 | C                 | 2.44951700  | -2.53262586 | 0.29302606  |
| C                  | 3.31676424  | 1.21530609  | -1.47122211 | C                 | 0.26438606  | -3.46470789 | 0.08581629  |
| C                  | 2.59273618  | 2.43026918  | -0.90737306 | C                 | -1.23295883 | -3.21191097 | -0.04333089 |
| C                  | -1.60233912 | 2.10717115  | 1.64796612  | C                 | 0.70188947  | 0.12888979  | -2.44006063 |
| C                  | -2.77906120 | 0.00024100  | -1.89055713 | C                 | -2.85902177 | 2.13080066  | -0.53884785 |
| C                  | -1.60121412 | -2.10974415 | 1.64596012  | C                 | 0.98301657  | 1.91455306  | 2.27907538  |
| C                  | 0.60397904  | 3.42767025  | -0.08426901 | C                 | -1.18211241 | -2.25262460 | -2.27248361 |
| C                  | -0.90927406 | 3.59607126  | -0.11320901 | C                 | -1.33495250 | -0.98753234 | -3.11520893 |
| C                  | -3.02397122 | 2.48049018  | -0.26432802 | C                 | -1.25625398 | 1.44064786  | -2.98450666 |
| C                  | -3.82987527 | 1.19840109  | -0.07547301 | C                 | -1.01089361 | 2.59821270  | -2.01770926 |
| C                  | -3.82899027 | -1.20065509 | -0.07685801 | C                 | -0.95780660 | 3.30414720  | 0.30554605  |
| C                  | -3.02205422 | -2.48188818 | -0.26710002 | C                 | 0.55608709  | 3.40459988  | 0.44726234  |
| H                  | -0.50113604 | -2.15681815 | -2.19853316 | H                 | 3.43165100  | 0.84724730  | -1.75987783 |
| H                  | 0.79410706  | -3.23085323 | -2.81945420 | H                 | 4.82190442  | -0.12605931 | -1.20486008 |
| H                  | 0.99719307  | -1.45581711 | -2.80817720 | H                 | 3.36181965  | -0.91576415 | -1.86290985 |
| H                  | 4.96994336  | 0.00248500  | 0.31407602  | H                 | 1.21039398  | -3.05478818 | 2.62627861  |

|    |             |             |             |    |             |             |             |
|----|-------------|-------------|-------------|----|-------------|-------------|-------------|
| H  | 3.63243126  | -0.87167606 | 1.14433308  | H  | -0.25351185 | -2.07728399 | 2.25683786  |
| H  | 3.63108426  | 0.87355407  | 1.14550308  | H  | 1.29557911  | -1.27678816 | 2.41773581  |
| H  | 0.99544507  | 1.45868010  | -2.80612020 | H  | -3.64652827 | -2.63149602 | -1.13866891 |
| H  | 0.79184606  | 3.23368623  | -2.81660320 | H  | -3.27570757 | -0.89032494 | -1.33028828 |
| H  | -0.50299004 | 2.15902716  | -2.19601916 | H  | -3.25642979 | -1.59573384 | 0.28755259  |
| H  | -1.21467009 | -3.91932928 | -1.12292308 | H  | 3.11403305  | 3.11826624  | 1.12442996  |
| H  | -1.15326708 | -4.44822032 | 0.55577604  | H  | 2.75467672  | 2.51844417  | -0.50125535 |
| H  | 0.95339007  | -3.26110023 | 0.94597107  | H  | 4.54388023  | 1.29985684  | 0.74798297  |
| H  | 1.03726007  | -4.40019831 | -0.41180903 | H  | 3.36232796  | 0.77325107  | 1.94009911  |
| H  | 2.92726521  | -3.31969524 | -1.48558111 | H  | 3.29045146  | -1.27024143 | 1.81945766  |
| H  | 2.91892721  | -2.59452819 | 0.12845001  | H  | 4.42018834  | -1.74960546 | 0.55916602  |
| H  | 4.39913631  | -1.46222310 | -1.53593611 | H  | 2.53447672  | -2.66941232 | -0.79742564 |
| H  | 2.99319122  | -1.03332007 | -2.50807318 | H  | 2.83676745  | -3.47163857 | 0.75135352  |
| H  | 2.99218221  | 1.03836808  | -2.50713418 | H  | 0.68156490  | -3.73474040 | -0.89571604 |
| H  | 4.39793032  | 1.46741611  | -1.53477211 | H  | 0.39387315  | -4.37087307 | 0.71813447  |
| H  | 2.91707321  | 2.59710819  | 0.13084501  | H  | -1.66558711 | -3.02051717 | 0.95135812  |
| H  | 2.92460921  | 3.32373124  | -1.48256211 | H  | -1.69812847 | -4.15532960 | -0.40806496 |
| H  | -0.55827104 | 2.03944415  | 1.98917114  | H  | 1.03418116  | -0.79138689 | -1.94051241 |
| H  | -2.12334215 | 2.87332721  | 2.26440816  | H  | 1.17479638  | 0.17526997  | -3.44611648 |
| H  | -2.05165715 | 1.12700308  | 1.85392214  | H  | 1.09177085  | 0.95737216  | -1.83258226 |
| H  | -3.66514327 | 0.00010600  | -2.56600618 | H  | -3.42106421 | 3.05374849  | -0.79952718 |
| H  | -2.16966215 | 0.88124706  | -2.12632015 | H  | -3.20160411 | 1.32205449  | -1.19708814 |
| H  | -2.16875616 | -0.87992406 | -2.12715116 | H  | -3.10812268 | 1.83065334  | 0.49110978  |
| H  | -2.05134715 | -1.13017308 | 1.85297614  | H  | 1.39580993  | 0.94136183  | 2.57417395  |
| H  | -2.12177615 | -2.87704821 | 2.26134116  | H  | 1.42515613  | 2.69571497  | 2.93582375  |
| H  | -0.55728604 | -2.04158115 | 1.98751614  | H  | -0.09697297 | 1.85140714  | 2.47916586  |
| H  | 0.95109407  | 3.26181724  | 0.94902007  | H  | -0.12925978 | -2.56451142 | -2.28996484 |
| H  | 1.03389907  | 4.40190132  | -0.40796803 | H  | -1.75118191 | -3.06830049 | -2.77291720 |
| H  | -1.21770009 | 3.92007028  | -1.11906008 | H  | -2.40235679 | -0.78008908 | -3.27934391 |
| H  | -1.15656708 | 4.44736632  | 0.56015504  | H  | -0.90555767 | -1.19253043 | -4.12126741 |
| H  | -3.59613726 | 3.30243724  | 0.22472702  | H  | -0.81951057 | 1.71866438  | -3.96968271 |
| H  | -2.98486722 | 2.73894320  | -1.33502210 | H  | -2.33655777 | 1.32451743  | -3.15465405 |
| H  | -4.79720534 | 1.33371010  | -0.61397805 | H  | -1.52889601 | 3.49742105  | -2.42070874 |
| H  | -4.09246230 | 1.08276308  | 0.98778607  | H  | 0.05997848  | 2.84125623  | -2.02076844 |
| H  | -4.09177729 | -1.08641708 | 0.98650207  | H  | -1.33522432 | 4.31967614  | 0.04916109  |
| H  | -4.79616135 | -1.33609910 | -0.61561705 | H  | -1.40618065 | 3.04627477  | 1.27789347  |
| H  | -2.98251421 | -2.73898420 | -1.33810310 | H  | 0.76755996  | 4.23457173  | 1.15738201  |
| H  | -3.59366426 | -3.30489124 | 0.22082002  | H  | 0.99834280  | 3.72176176  | -0.50881548 |
| Na | 0.56265304  | 0.00004300  | 0.21889902  | Na | -0.50492358 | 0.02182610  | 0.17376423  |
| Ca | 1.49328311  | -0.00362000 | 4.28826831  | Ca | -2.82190330 | -0.17167125 | 3.93165094  |

| Chair (K-HMHC)-Be |             |             |             | Boat (K-HMHC)-Be |             |             |             |
|-------------------|-------------|-------------|-------------|------------------|-------------|-------------|-------------|
| N                 | 0.02466869  | -2.78537962 | -0.44918676 | N                | -0.13563500 | 2.58026800  | -0.95708100 |
| N                 | 2.66294863  | -1.45454672 | 0.19312278  | N                | 2.50750100  | 1.51213100  | 0.27732100  |
| N                 | 2.41218091  | 1.46706393  | -0.44786334 | N                | 2.48975600  | -1.56900100 | 0.44842500  |
| N                 | -0.02935722 | 2.99950399  | 0.37352385  | N                | 0.12536700  | -2.27843100 | -1.17189100 |
| N                 | -2.43835288 | 1.42051087  | -0.45317386 | N                | -2.33780300 | -1.77332500 | 0.39840300  |

|   |             |             |             |   |             |             |             |
|---|-------------|-------------|-------------|---|-------------|-------------|-------------|
| N | -2.63519768 | -1.50174102 | 0.19990797  | N | -2.64387000 | 1.29018600  | 0.32730500  |
| C | 0.01667422  | -2.47727340 | -1.86202216 | C | -0.18890800 | 2.28674500  | -2.37546500 |
| C | 2.84719818  | -1.45977408 | 1.63555338  | C | 2.64748200  | 2.01648500  | 1.63531400  |
| C | 2.02094775  | 1.37168925  | -1.83754160 | C | 2.23267000  | -2.45872700 | 1.56669800  |
| C | -2.49253492 | -2.84886558 | -0.32687980 | C | -2.62178900 | 2.44216000  | -0.56017700 |
| C | -1.15774199 | -3.51602985 | -0.01174721 | C | -1.33985600 | 3.26667800  | -0.50317700 |
| C | 1.22295783  | -3.49535228 | -0.02123304 | C | 1.05293200  | 3.35449700  | -0.61808800 |
| C | 2.54327518  | -2.80142259 | -0.33982542 | C | 2.37066700  | 2.58946900  | -0.68985500 |
| C | 3.69880845  | -0.69431617 | -0.48039372 | C | 3.59622300  | 0.61655400  | -0.08452700 |
| C | 3.67793713  | 0.80090255  | -0.18039585 | C | 3.62979500  | -0.69726200 | 0.69160500  |
| C | -0.03713237 | 2.94271389  | 1.82600696  | C | 0.10718400  | -1.16383600 | -2.09136800 |
| C | -2.04285527 | 1.32099103  | -1.84135739 | C | -2.01859500 | -2.66507400 | 1.49865700  |
| C | -2.81528351 | -1.50331807 | 1.64283450  | C | -2.81608200 | 1.68587900  | 1.71715100  |
| C | 2.45401221  | 2.83595403  | 0.04466099  | C | 2.60380900  | -2.26865000 | -0.81710100 |
| C | 1.16886890  | 3.63617854  | -0.14382896 | C | 1.35577800  | -3.04428200 | -1.23199500 |
| C | -1.23362697 | 3.61252603  | -0.15794900 | C | -1.04915700 | -3.12276000 | -1.28133800 |
| C | -2.50692552 | 2.79268617  | 0.02670718  | C | -2.35895700 | -2.44378800 | -0.88864700 |
| C | -3.69193954 | 0.73317213  | -0.18203528 | C | -3.56419600 | -1.02514000 | 0.63499500  |
| C | -3.68626805 | -0.76363195 | -0.47458702 | C | -3.63804600 | 0.31469800  | -0.09221700 |
| H | -0.87144822 | -1.88361572 | -2.11899545 | H | -1.04168800 | 1.63769700  | -2.61262500 |
| H | 0.02217091  | -3.38406546 | -2.50770777 | H | -0.28051400 | 3.20970000  | -2.99069000 |
| H | 0.89228856  | -1.86816945 | -2.12581661 | H | 0.71523300  | 1.75529000  | -2.69928000 |
| H | 3.83438164  | -1.88176197 | 1.92474781  | H | 3.59306600  | 2.58547800  | 1.77136500  |
| H | 2.06493381  | -2.05017410 | 2.13393744  | H | 2.61738100  | 1.19874600  | 2.36802400  |
| H | 2.76625961  | -0.44552396 | 2.05086157  | H | 1.80998500  | 2.67300300  | 1.90413400  |
| H | 1.92282721  | 0.31879609  | -2.13537026 | H | 3.05235000  | -3.19239400 | 1.72968200  |
| H | 2.74724525  | 1.85751376  | -2.52686217 | H | 1.30079900  | -3.01775700 | 1.40570500  |
| H | 1.04047255  | 1.83911085  | -1.99153514 | H | 2.08924600  | -1.87242500 | 2.48748000  |
| H | -2.63613897 | -2.81023526 | -1.41766720 | H | -3.46836700 | 3.13134300  | -0.34330700 |
| H | -3.29290139 | -3.52114587 | 0.05452168  | H | -2.78721800 | 2.08983800  | -1.58925200 |
| H | -1.06377920 | -3.67396271 | 1.07430125  | H | -1.51304000 | 4.19325700  | -1.09676800 |
| H | -1.18900447 | -4.53108794 | -0.47083985 | H | -1.16918100 | 3.59843700  | 0.53140000  |
| H | 1.27101211  | -4.50761258 | -0.48503429 | H | 0.92042100  | 3.75210200  | 0.39800500  |
| H | 1.13762841  | -3.66004527 | 1.06447524  | H | 1.14572700  | 4.24466200  | -1.28056800 |
| H | 3.35820892  | -3.46030093 | 0.03415279  | H | 2.49295500  | 2.16330800  | -1.69738900 |
| H | 2.68059271  | -2.75453093 | -1.43110988 | H | 3.19112800  | 3.33431200  | -0.57823400 |
| H | 3.59851472  | -0.85513324 | -1.56513782 | H | 3.51570600  | 0.40144200  | -1.16183700 |
| H | 4.71559708  | -1.06413308 | -0.21481081 | H | 4.58391100  | 1.11329400  | 0.05309100  |
| H | 3.92824092  | 0.96898326  | 0.87793929  | H | 3.67173900  | -0.48306100 | 1.76831500  |
| H | 4.50423613  | 1.26505132  | -0.76664962 | H | 4.58713500  | -1.21024500 | 0.45112600  |
| H | 0.83951329  | 2.40299130  | 2.21025292  | H | 0.95733300  | -0.49330000 | -1.89937800 |
| H | -0.05058932 | 3.95646590  | 2.28294023  | H | 0.15184100  | -1.48091500 | -3.15721100 |
| H | -0.90675322 | 2.38470965  | 2.19976856  | H | -0.80653600 | -0.56953900 | -1.95211000 |
| H | -2.77680442 | 1.78775098  | -2.53573068 | H | -2.76091700 | -3.48431000 | 1.61912200  |
| H | -1.07094738 | 1.80525030  | -1.99763588 | H | -1.02894600 | -3.11830000 | 1.35020900  |
| H | -1.92474867 | 0.26777608  | -2.13045845 | H | -1.96240200 | -2.09496200 | 2.43840900  |
| H | -2.75202656 | -0.48574197 | 2.05308071  | H | -2.08143300 | 2.44962400  | 2.00336900  |
| H | -3.79372029 | -1.94194324 | 1.93692395  | H | -3.83196600 | 2.09471700  | 1.90955500  |

|    |             |             |             |    |             |             |             |
|----|-------------|-------------|-------------|----|-------------|-------------|-------------|
| H  | -2.02091314 | -2.07699254 | 2.14170814  | H  | -2.63754600 | 0.84342800  | 2.40001300  |
| H  | 2.71688618  | 2.79639801  | 1.11329937  | H  | 2.85663400  | -1.53773900 | -1.59960600 |
| H  | 3.26698260  | 3.41631688  | -0.44972023 | H  | 3.44890500  | -2.99540000 | -0.80232000 |
| H  | 1.01711496  | 3.83212249  | -1.21641915 | H  | 1.23757900  | -3.92076200 | -0.57710100 |
| H  | 1.33491394  | 4.63425797  | 0.32075956  | H  | 1.53977500  | -3.45050500 | -2.25300800 |
| H  | -1.41999893 | 4.61111564  | 0.29794501  | H  | -1.17674900 | -3.52048500 | -2.31413400 |
| H  | -1.07640181 | 3.80296874  | -1.23079681 | H  | -0.89036300 | -4.00250900 | -0.63991600 |
| H  | -3.32532268 | 3.35508913  | -0.47938255 | H  | -3.15127800 | -3.22730400 | -0.92103800 |
| H  | -2.77817017 | 2.75832511  | 1.09337537  | H  | -2.63799900 | -1.70983200 | -1.65940700 |
| H  | -3.94501810 | 0.90212809  | 0.87552529  | H  | -4.45923900 | -1.61858900 | 0.34521200  |
| H  | -4.52656458 | 1.17933912  | -0.77048635 | H  | -3.65971700 | -0.85601300 | 1.71625300  |
| H  | -3.58568376 | -0.92784910 | -1.55879496 | H  | -4.67058300 | 0.71108700  | 0.04492800  |
| H  | -4.69558898 | -1.15045126 | -0.20477434 | H  | -3.51808800 | 0.14995400  | -1.17497100 |
| K  | 0.00377238  | -0.04042143 | 0.59445389  | K  | -0.00051500 | 0.02516400  | 0.81107700  |
| Be | 0.01859104  | -1.09470870 | 3.87162057  | Be | 0.00544200  | 0.90320700  | 4.14353400  |

| Chair (K-HMHC)-Mg |             |             |             | Boat (K-HMHC)-Mg |             |             |             |
|-------------------|-------------|-------------|-------------|------------------|-------------|-------------|-------------|
| N                 | 1.32087828  | 2.53798488  | -0.50162169 | N                | 0.21065857  | -2.67948532 | -0.95770017 |
| N                 | -1.64846619 | 2.51041281  | -0.05938965 | N                | -2.49456251 | -1.48032506 | 0.04642726  |
| N                 | -2.68017353 | -0.22366397 | -0.79592574 | N                | -2.41146774 | 1.60123448  | -0.06583560 |
| N                 | -1.21507969 | -2.74473071 | -0.04765634 | N                | 0.12573168  | 2.09148125  | -1.52155988 |
| N                 | 1.71452492  | -2.29368748 | -0.50106521 | N                | 2.38727565  | 1.74592292  | 0.34508686  |
| N                 | 3.03060845  | 0.24381166  | 0.38583900  | N                | 2.61604099  | -1.32879525 | 0.47387749  |
| C                 | 1.32951809  | 2.16117294  | -1.89881997 | C                | 0.35786491  | -2.51953065 | -2.39146277 |
| C                 | -1.78301079 | 2.65615230  | 1.38049240  | C                | -2.73217375 | -1.90378306 | 1.41793716  |
| C                 | -2.24485017 | -0.19662633 | -2.17529860 | C                | -2.28174238 | 2.68211529  | 0.89610662  |
| C                 | 3.57873714  | 1.49723939  | -0.10144907 | C                | 2.65605778  | -2.51466080 | -0.36748468 |
| C                 | 2.65627297  | 2.70197798  | 0.05476906  | C                | 1.37277484  | -3.33990070 | -0.37492936 |
| C                 | 0.52760984  | 3.73221587  | -0.25029420 | C                | -1.01512859 | -3.39887736 | -0.62922164 |
| C                 | -0.94026703 | 3.63082304  | -0.65104242 | C                | -2.30648108 | -2.61551433 | -0.84370381 |
| C                 | -2.93329747 | 2.28158430  | -0.70010446 | C                | -3.55546899 | -0.60451419 | -0.43515202 |
| C                 | -3.53450340 | 0.90335570  | -0.44440936 | C                | -3.58652926 | 0.78275450  | 0.20092130  |
| C                 | -1.31103464 | -2.89390986 | 1.39477390  | C                | 0.27656028  | 0.88977271  | -2.30943519 |
| C                 | 1.64733419  | -1.91871053 | -1.89711593 | C                | 1.99255091  | 2.72878395  | 1.33858907  |
| C                 | 2.91114961  | 0.22533577  | 1.83426066  | C                | 2.64023923  | -1.66650982 | 1.88878841  |
| C                 | -3.33976871 | -1.47000905 | -0.42805901 | C                | -2.37574938 | 2.07616048  | -1.43704744 |
| C                 | -2.52569184 | -2.73555411 | -0.67656810 | C                | -1.09617227 | 2.81451772  | -1.82180328 |
| C                 | -0.33882570 | -3.74044270 | -0.63664668 | C                | 1.29569273  | 2.94783925  | -1.56535761 |
| C                 | 1.12829471  | -3.60091467 | -0.24500039 | C                | 2.55704614  | 2.32072533  | -0.97650728 |
| C                 | 3.06495502  | -2.23973170 | 0.03970023  | C                | 3.55627385  | 0.98517750  | 0.76189109  |
| C                 | 3.77416846  | -0.89827325 | -0.11548417 | C                | 3.67470511  | -0.39431721 | 0.11950443  |
| H                 | 1.89206408  | 1.22961104  | -2.03971911 | H                | 1.24196181  | -1.91588031 | -2.63340201 |
| H                 | 1.77992075  | 2.93881414  | -2.55513840 | H                | 0.45978721  | -3.49815754 | -2.91111054 |
| H                 | 0.30612610  | 1.97193366  | -2.25013511 | H                | -0.50941073 | -2.00120542 | -2.82006842 |
| H                 | -2.32544431 | 3.58621462  | 1.65649090  | H                | -3.64284154 | -2.53534600 | 1.50553510  |
| H                 | -0.80080280 | 2.66846860  | 1.87460306  | H                | -2.85211602 | -1.03931910 | 2.08602673  |
| H                 | -2.33329686 | 1.80819293  | 1.81361835  | H                | -1.87869946 | -2.47222253 | 1.81195779  |

|    |             |             |             |    |             |             |             |
|----|-------------|-------------|-------------|----|-------------|-------------|-------------|
| H  | -1.69702439 | 0.73216843  | -2.38538413 | H  | -3.06676478 | 3.45960973  | 0.77319018  |
| H  | -3.08659445 | -0.26997339 | -2.89965722 | H  | -1.29945011 | 3.16662140  | 0.80396887  |
| H  | -1.55287002 | -1.02620418 | -2.37430379 | H  | -2.35245078 | 2.28530351  | 1.92040923  |
| H  | 3.83469287  | 1.36969964  | -1.16455612 | H  | 3.48456582  | -3.19339066 | -0.06344893 |
| H  | 4.53583769  | 1.75052980  | 0.40746792  | H  | 2.89470765  | -2.20010920 | -1.39456430 |
| H  | 2.54323434  | 2.95097130  | 1.12152846  | H  | 1.59238265  | -4.29411999 | -0.90548717 |
| H  | 3.18003428  | 3.56933793  | -0.40891933 | H  | 1.11960655  | -3.62270060 | 0.65705498  |
| H  | 0.95214986  | 4.61264922  | -0.78523841 | H  | -0.95457481 | -3.71416165 | 0.42212188  |
| H  | 0.60479351  | 3.96541709  | 0.82264141  | H  | -1.09117177 | -4.33848731 | -1.22149835 |
| H  | -1.41795193 | 4.60134240  | -0.38623145 | H  | -2.34278560 | -2.24842431 | -1.88055894 |
| H  | -1.01851519 | 3.55075516  | -1.74635062 | H  | -3.14925159 | -3.33774320 | -0.75078294 |
| H  | -2.80915022 | 2.43351175  | -1.78327939 | H  | -3.44383859 | -0.50639485 | -1.52590480 |
| H  | -3.68803194 | 3.03308221  | -0.37853858 | H  | -4.55562902 | -1.06640984 | -0.27585128 |
| H  | -3.79984286 | 0.79840301  | 0.61955957  | H  | -3.69010382 | 0.68627238  | 1.29193151  |
| H  | -4.49630916 | 0.86279753  | -1.00543270 | H  | -4.51595966 | 1.28827433  | -0.14445286 |
| H  | -1.99352171 | -2.14590479 | 1.82397979  | H  | -0.59965614 | 0.23832180  | -2.18435796 |
| H  | -1.68676553 | -3.89854000 | 1.68627449  | H  | 0.39867032  | 1.09643146  | -3.39619680 |
| H  | -0.33666764 | -2.73513056 | 1.87898817  | H  | 1.15088802  | 0.31585153  | -1.97084191 |
| H  | 2.20992461  | -2.61313948 | -2.56018661 | H  | 2.74954761  | 3.53222577  | 1.47239107  |
| H  | 0.60318643  | -1.89604167 | -2.23704978 | H  | 1.04049160  | 3.19931883  | 1.05691532  |
| H  | 2.05195975  | -0.90890502 | -2.04076030 | H  | 1.82418224  | 2.23432202  | 2.30830531  |
| H  | 2.41632884  | -0.69166868 | 2.18437165  | H  | 1.85556257  | -2.39529911 | 2.12994016  |
| H  | 3.90023629  | 0.29894940  | 2.33711137  | H  | 3.61858403  | -2.09630468 | 2.19791362  |
| H  | 2.28118423  | 1.05072578  | 2.19537323  | H  | 2.42209986  | -0.79037044 | 2.51732819  |
| H  | -3.61138788 | -1.39880528 | 0.63723739  | H  | -2.51938389 | 1.22021431  | -2.11228203 |
| H  | -4.29904113 | -1.59048183 | -0.98186500 | H  | -3.22507651 | 2.76778992  | -1.64396426 |
| H  | -2.38858464 | -2.87820767 | -1.75945618 | H  | -1.05742959 | 3.77658803  | -1.28976539 |
| H  | -3.14542089 | -3.59565340 | -0.33910171 | H  | -1.16853034 | 3.06890195  | -2.90376559 |
| H  | -0.65198006 | -4.77346148 | -0.36250267 | H  | 1.53622054  | 3.26558604  | -2.60577987 |
| H  | -0.43516834 | -3.68203829 | -1.73194369 | H  | 1.05655928  | 3.87117600  | -1.01662092 |
| H  | 1.68700145  | -4.40097147 | -0.78297941 | H  | 3.34415473  | 3.10965625  | -0.97466640 |
| H  | 1.24937781  | -3.81782311 | 0.82731874  | H  | 2.92596911  | 1.53731305  | -1.65494981 |
| H  | 3.00747010  | -2.51149165 | 1.10525624  | H  | 4.49601344  | 1.54038464  | 0.54731616  |
| H  | 3.71884441  | -3.00582817 | -0.43699152 | H  | 3.51953446  | 0.87563234  | 1.85482365  |
| H  | 3.99544844  | -0.72369528 | -1.17971988 | H  | 4.67433632  | -0.80417783 | 0.39146696  |
| H  | 4.76468748  | -0.99288228 | 0.38380605  | H  | 3.68046543  | -0.28825576 | -0.97686478 |
| K  | -0.00675483 | 0.00944638  | 0.44814686  | K  | -0.01092027 | 0.01671308  | 0.67598616  |
| Mg | -1.45571477 | -0.09926749 | 4.03512818  | Mg | -1.21511153 | 0.51945614  | 4.29941525  |

| Chair (K-HMHC)-Ca |             |             |             | Boat (K-HMHC)-Ca |             |             |             |
|-------------------|-------------|-------------|-------------|------------------|-------------|-------------|-------------|
| N                 | 1.63414447  | -2.42270571 | -0.51326076 | N                | 0.48396356  | -2.80903654 | -0.73280291 |
| N                 | 3.06374440  | 0.02290538  | 0.47378899  | N                | -2.37519491 | -1.62954174 | -0.31642167 |
| N                 | 1.59522729  | 2.44688013  | -0.51151633 | N                | -2.37669929 | 1.40873665  | -0.85427274 |
| N                 | -1.40013653 | 2.60015382  | -0.40949718 | N                | 0.32996664  | 1.83500817  | -1.96702212 |
| N                 | -2.51172053 | -0.01907819 | -1.34097418 | N                | 2.33268568  | 1.84994269  | 0.20429382  |
| N                 | -1.36089519 | -2.62060211 | -0.40512661 | N                | 2.63340410  | -1.16077679 | 0.80068186  |
| C                 | 1.71334218  | -2.10981276 | -1.92381026 | C                | 0.81135313  | -2.83863653 | -2.14514975 |

|   |             |             |             |   |             |             |             |
|---|-------------|-------------|-------------|---|-------------|-------------|-------------|
| C | 2.85171200  | 0.01853734  | 1.91236391  | C | -2.82398675 | -1.84139508 | 1.05065088  |
| C | 1.68334063  | 2.13101136  | -1.92092201 | C | -2.42121883 | 2.58592182  | -0.00531289 |
| C | -0.50307502 | -3.72364155 | -0.80138659 | C | 2.82234505  | -2.43984510 | 0.13406795  |
| C | 0.91546500  | -3.66002449 | -0.24420553 | C | 1.58146079  | -3.32505580 | 0.07702630  |
| C | 2.93810304  | -2.45645281 | 0.13351759  | C | -0.74731092 | -3.54071975 | -0.45797063 |
| C | 3.75285241  | -1.17233995 | 0.02122433  | C | -2.02503954 | -2.88237429 | -0.96837021 |
| C | 3.73337089  | 1.23117694  | 0.02644226  | C | -3.35707244 | -0.88838927 | -1.09657284 |
| C | 2.89648568  | 2.50093310  | 0.13948367  | C | -3.55050673 | 0.56594273  | -0.67595905 |
| C | -1.73041551 | 2.64728689  | 1.00451556  | C | 0.59329018  | 0.53242362  | -2.53431137 |
| C | -1.84373954 | -0.01368962 | -2.62477424 | C | 1.79162883  | 2.96019953  | 0.96790257  |
| C | -1.69409160 | -2.67136189 | 1.00824591  | C | 2.47664282  | -1.31771895 | 2.23811248  |
| C | 0.85887093  | 3.67504706  | -0.24916462 | C | -2.15469135 | 1.73962492  | -2.25016557 |
| C | -0.55963248 | 3.71529046  | -0.80839436 | C | -0.84514697 | 2.47134627  | -2.53137485 |
| C | -2.58755531 | 2.49507304  | -1.23980569 | C | 1.48679477  | 2.70967796  | -1.99367522 |
| C | -3.32874419 | 1.16670868  | -1.12401232 | C | 2.66677359  | 2.21978409  | -1.15873798 |
| C | -3.31021039 | -1.21745491 | -1.12436673 | C | 3.45244640  | 1.21502099  | 0.88385695  |
| C | -2.54802586 | -2.53404221 | -1.23815889 | C | 3.70525946  | -0.23229358 | 0.47082614  |
| H | 0.70645340  | -2.03049921 | -2.35461102 | H | 1.70806467  | -2.24163144 | -2.35480563 |
| H | 2.27824583  | -2.87088684 | -2.50683110 | H | 0.99826671  | -3.87382459 | -2.50785798 |
| H | 2.20131083  | -1.13729336 | -2.07251620 | H | -0.00181735 | -2.41357536 | -2.74720979 |
| H | 3.81029335  | 0.02536080  | 2.47627655  | H | -3.76350807 | -2.43463347 | 1.09372388  |
| H | 2.27113985  | -0.85910536 | 2.22997454  | H | -2.99159614 | -0.88575558 | 1.56626354  |
| H | 2.25774896  | 0.88620435  | 2.23270473  | H | -2.05939137 | -2.36322177 | 1.64132126  |
| H | 2.18380813  | 1.16417718  | -2.06508696 | H | -3.22962479 | 3.29282108  | -0.29291861 |
| H | 2.24067905  | 2.89746151  | -2.50417630 | H | -1.46417270 | 3.12458980  | -0.04241482 |
| H | 0.67903029  | 2.03794069  | -2.35491724 | H | -2.57538743 | 2.28752379  | 1.04251761  |
| H | -0.46354332 | -3.75048545 | -1.90113908 | H | 3.62817055  | -3.03094045 | 0.62492107  |
| H | -0.93098115 | -4.70424499 | -0.49439557 | H | 3.18025962  | -2.24518317 | -0.88806476 |
| H | 0.89528069  | -3.80158470 | 0.84763453  | H | 1.90271602  | -4.32744325 | -0.28650326 |
| H | 1.46300483  | -4.53841230 | -0.65666848 | H | 1.20408762  | -3.48425119 | 1.09745319  |
| H | 3.56823213  | -3.27702312 | -0.28012869 | H | -0.82297452 | -3.68154537 | 0.62984050  |
| H | 2.77679189  | -2.70415012 | 1.19404762  | H | -0.70267635 | -4.56491840 | -0.89266178 |
| H | 4.69956031  | -1.33605897 | 0.58364012  | H | -1.93248849 | -2.69317402 | -2.04833172 |
| H | 4.05409943  | -1.01989261 | -1.02673827 | H | -2.84531391 | -3.62814721 | -0.86480670 |
| H | 4.04052818  | 1.08690803  | -1.02092952 | H | -3.04796301 | -0.92545012 | -2.15258721 |
| H | 4.67539190  | 1.40956526  | 0.59219391  | H | -4.35375422 | -1.38327365 | -1.05568364 |
| H | 2.72766567  | 2.74337816  | 1.20010459  | H | -3.83959746 | 0.60548337  | 0.38389174  |
| H | 3.51405177  | 3.33285071  | -0.27044562 | H | -4.42305422 | 0.96606537  | -1.23853602 |
| H | -0.82410626 | 2.63082423  | 1.62679856  | H | -0.28196732 | -0.12118306 | -2.41321259 |
| H | -2.31871518 | 3.55256052  | 1.26850179  | H | 0.84520401  | 0.57390587  | -3.61761530 |
| H | -2.31617260 | 1.76606641  | 1.30184874  | H | 1.42748510  | 0.04694038  | -2.00842193 |
| H | -2.55196075 | -0.01809446 | -3.48299578 | H | 2.50441199  | 3.80927398  | 1.05507621  |
| H | -1.20260251 | 0.87284561  | -2.71775527 | H | 0.86876931  | 3.33381178  | 0.50289929  |
| H | -1.19053187 | -0.89123533 | -2.71881473 | H | 1.51931349  | 2.62195593  | 1.97967658  |
| H | -2.29114815 | -1.79720967 | 1.30398162  | H | 1.66693770  | -2.02191627 | 2.47011031  |
| H | -2.27196152 | -3.58368170 | 1.27098874  | H | 3.40797145  | -1.68769621 | 2.72101205  |
| H | -0.78960818 | -2.64381926 | 1.63278031  | H | 2.18214088  | -0.37196516 | 2.71544358  |
| H | 0.83530927  | 3.82155317  | 0.84192517  | H | -2.18837798 | 0.81308025  | -2.84148969 |

|    |             |             |             |    |             |             |             |
|----|-------------|-------------|-------------|----|-------------|-------------|-------------|
| H  | 1.39441399  | 4.55918656  | -0.66506711 | H  | -2.97707305 | 2.37849052  | -2.64714493 |
| H  | -0.51932459 | 3.73924987  | -1.90821648 | H  | -0.90244477 | 3.49220002  | -2.12478146 |
| H  | -1.00311321 | 4.69005053  | -0.50479473 | H  | -0.75963441 | 2.58929069  | -3.63581862 |
| H  | -3.32090908 | 3.29971307  | -1.00863052 | H  | 1.85756057  | 2.87156010  | -3.03172479 |
| H  | -2.28949181 | 2.65813950  | -2.28699059 | H  | 1.16819290  | 3.69861515  | -1.63107669 |
| H  | -4.17557089 | 1.20638966  | -1.84686070 | H  | 3.43789212  | 3.02410996  | -1.17979970 |
| H  | -3.78825738 | 1.07814465  | -0.12740261 | H  | 3.12964381  | 1.35400870  | -1.65451935 |
| H  | -3.77243191 | -1.13555124 | -0.12844958 | H  | 4.39590670  | 1.78228611  | 0.72284560  |
| H  | -4.15533315 | -1.27099263 | -1.84831536 | H  | 3.26201930  | 1.25739823  | 1.96549485  |
| H  | -2.24517065 | -2.69265575 | -2.28464825 | H  | 4.66502656  | -0.55001332 | 0.93853095  |
| H  | -3.26923414 | -3.34997564 | -1.00833554 | H  | 3.87145326  | -0.27893758 | -0.61680234 |
| K  | 0.04875279  | -0.00139162 | 0.24556939  | K  | -0.05871097 | 0.07706690  | 0.48976862  |
| Ca | -1.75400195 | -0.01028091 | 4.50209960  | Ca | -1.72640888 | 1.05997950  | 4.61739561  |



Table S1. Electronic first hyperpolarizability tensors ( $\beta_{zzz}^e$ , a.u.) at the  $\omega$ B97XD method with different basis sets.

|                                                | chair form         |                    | boat form          |                    |
|------------------------------------------------|--------------------|--------------------|--------------------|--------------------|
|                                                | ma-SVP             | ma-TZVP            | ma-SVP             | ma-TZVP            |
| $\delta^+(\text{Li-HMHC})\text{-AM}^{\delta-}$ |                    |                    |                    |                    |
| AM <sup>+</sup> = Be                           | $1.02 \times 10^4$ | $1.07 \times 10^4$ | $1.15 \times 10^4$ | $1.26 \times 10^4$ |
| AM <sup>+</sup> = Mg                           | $2.33 \times 10^4$ | $2.39 \times 10^4$ | $2.78 \times 10^4$ | $2.95 \times 10^4$ |
| AM <sup>+</sup> = Ca                           | $1.96 \times 10^4$ | $2.57 \times 10^4$ | $1.86 \times 10^4$ | $3.10 \times 10^4$ |
| $\delta^+(\text{Na-HMHC})\text{-AM}^{\delta-}$ |                    |                    |                    |                    |
| AM <sup>+</sup> = Be                           | $1.21 \times 10^4$ | $1.59 \times 10^4$ | $1.44 \times 10^4$ | $1.81 \times 10^4$ |
| AM <sup>+</sup> = Mg                           | $2.69 \times 10^4$ | $2.67 \times 10^4$ | $3.44 \times 10^4$ | $3.47 \times 10^4$ |
| AM <sup>+</sup> = Ca                           | $2.41 \times 10^4$ | $3.31 \times 10^4$ | $2.18 \times 10^4$ | $3.55 \times 10^4$ |
| $\delta^+(\text{K-HMHC})\text{-AM}^{\delta-}$  |                    |                    |                    |                    |
| AM <sup>+</sup> = Be                           | $1.06 \times 10^4$ | $1.36 \times 10^4$ | $1.65 \times 10^4$ | $2.02 \times 10^4$ |
| AM <sup>+</sup> = Mg                           | $1.57 \times 10^4$ | $1.26 \times 10^4$ | $2.46 \times 10^4$ | $2.82 \times 10^4$ |
| AM <sup>+</sup> = Ca                           | $2.58 \times 10^4$ | $3.54 \times 10^4$ | $2.71 \times 10^4$ | $3.90 \times 10^4$ |

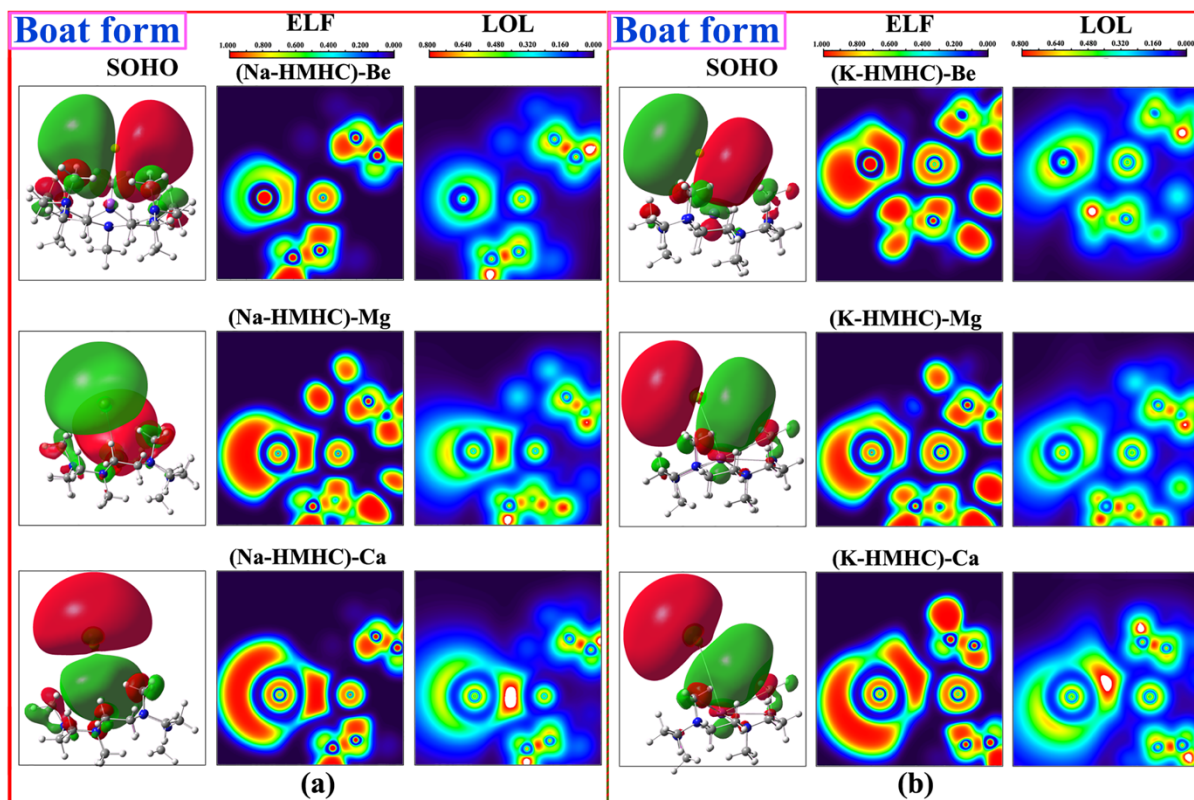

**Fig. S1.** SOMO and ELF as well as LOL maps for chair forms: (a)  $\delta^+(\text{Na-HMHC})\text{-AM}'\delta^-$  and (b)  $\delta^+(\text{K-HMHC})\text{-AM}'\delta^-$ , ( $\text{AM}' = \text{Be, Mg \& Ca}$ ).

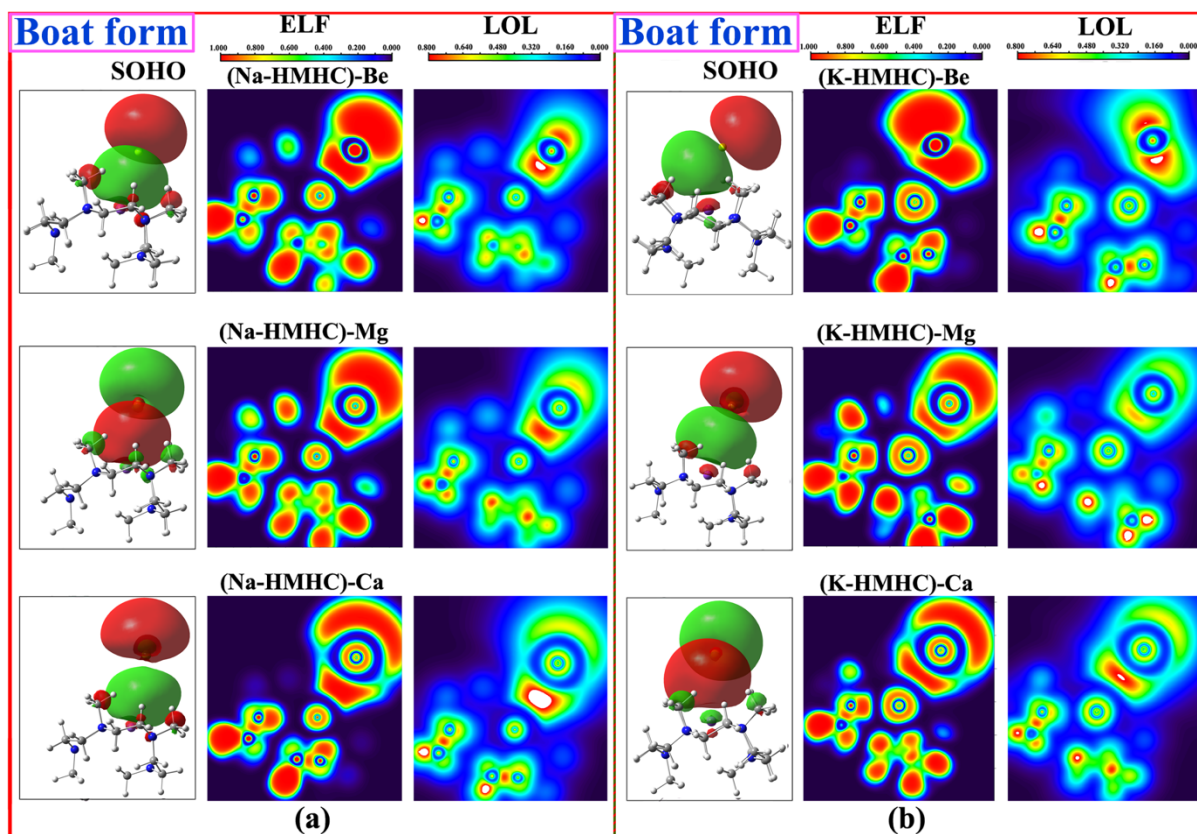

**Fig. S2.** SOMO and ELF as well as LOL maps for boat forms: (a)  $\delta^+(\text{Na-HMHC})\text{-AM}'\delta^-$  and (b)  $\delta^+(\text{K-HMHC})\text{-AM}'\delta^-$ , (AM' = Be, Mg & Ca).

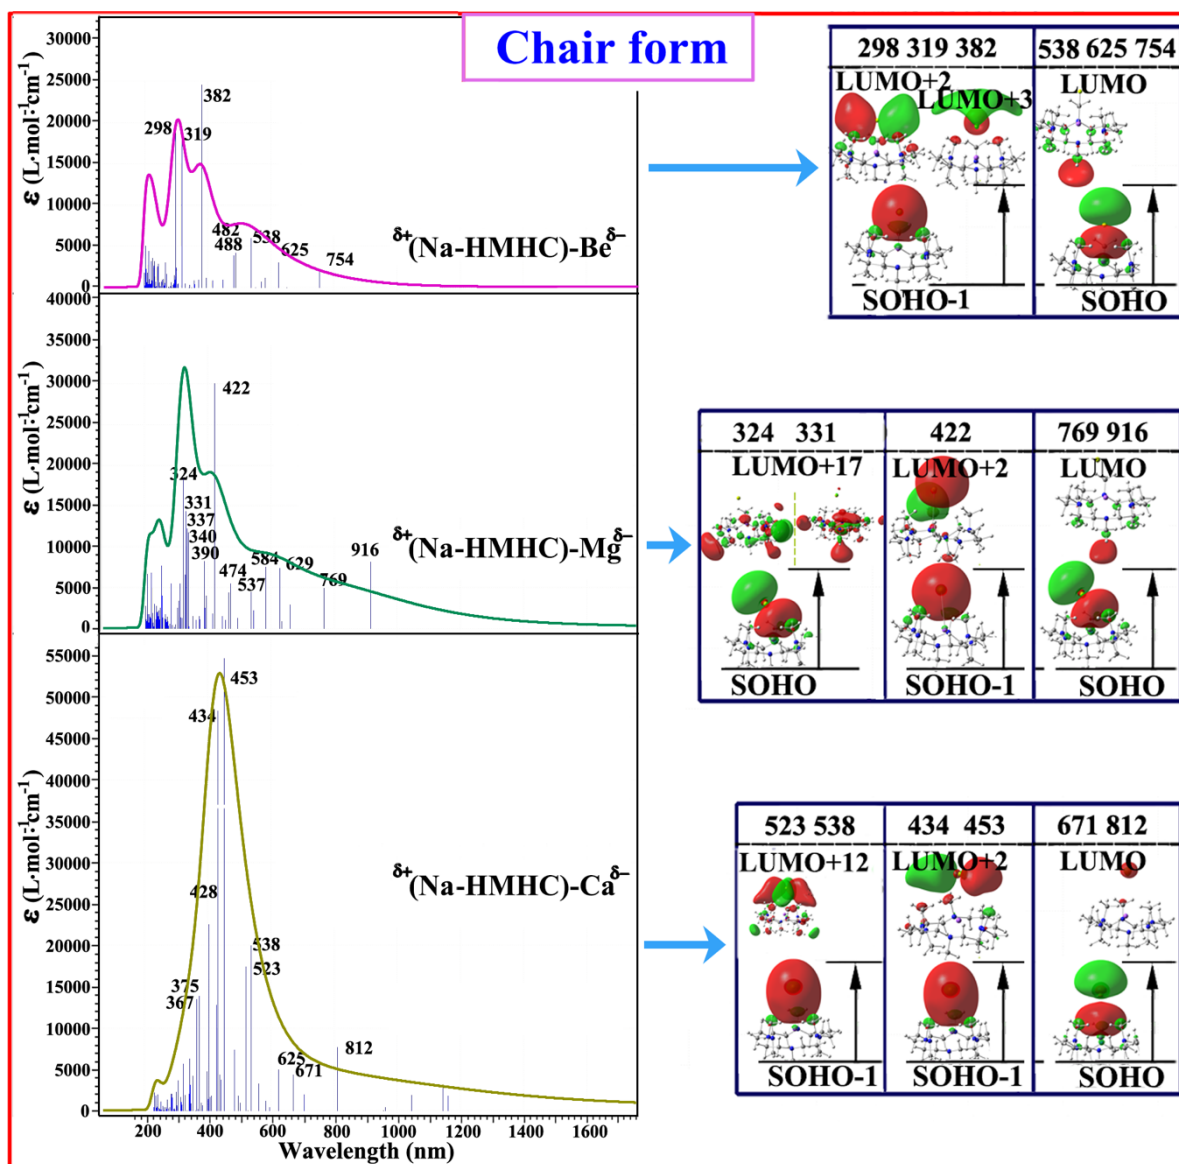

Fig. S3. Electronic absorption spectra of chair forms of  $\delta^+(\text{Na-HMHC})\text{-AM}'^{\delta^-}$ , (AM' = Be, Mg & Ca).

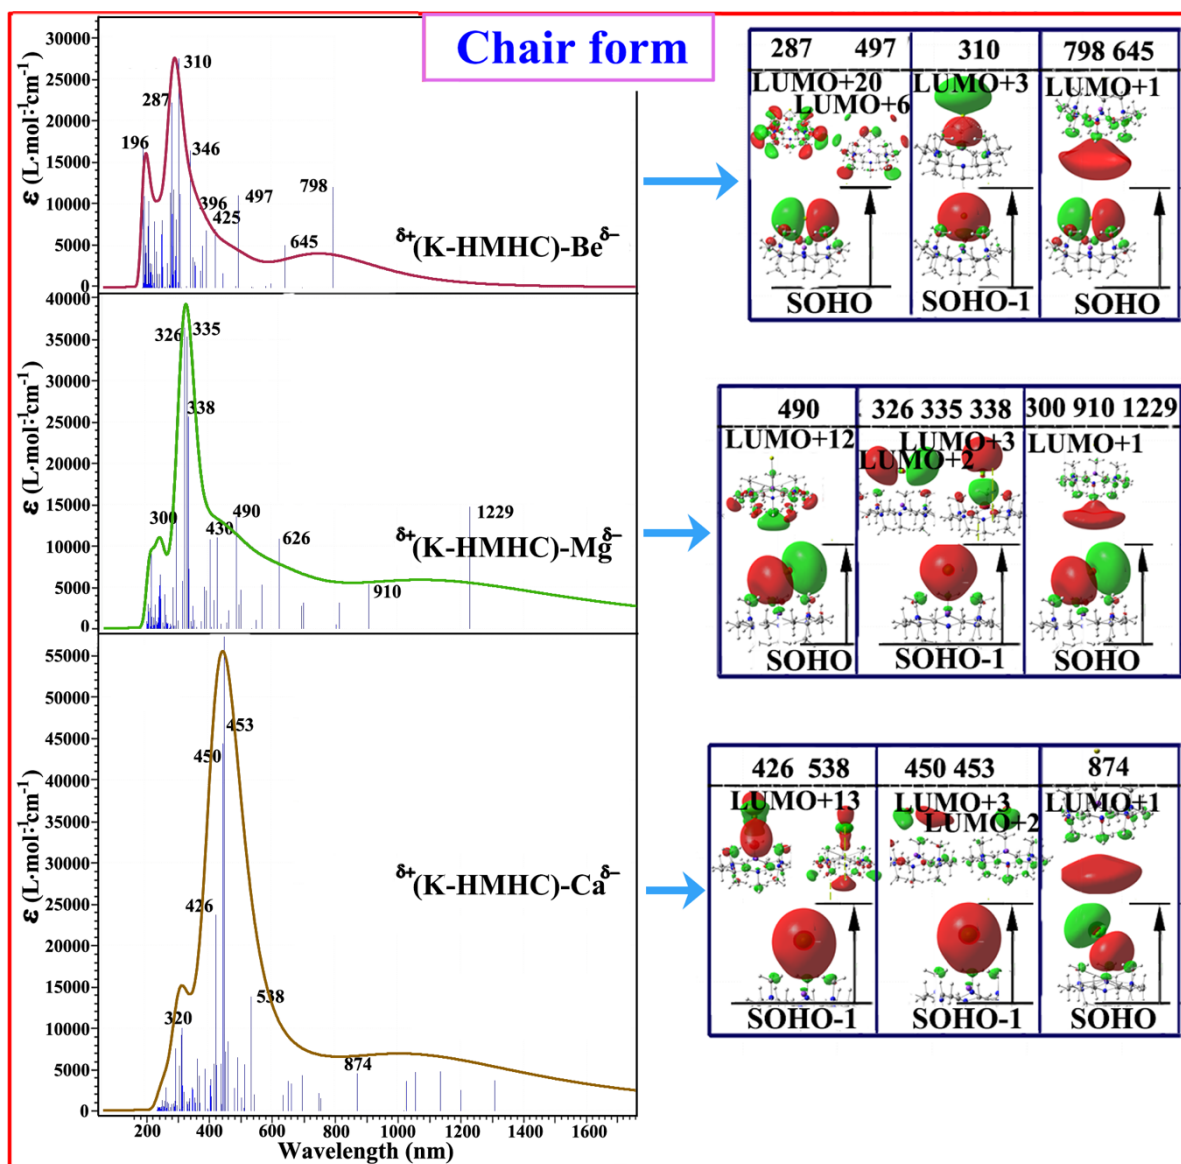

Fig. S4. Electronic absorption spectra of chair forms of  $\delta^+(\text{K-HMHC})\text{-AM}'\delta^-$ , ( $\text{AM}' = \text{Be}, \text{Mg} \& \text{Ca}$ ).

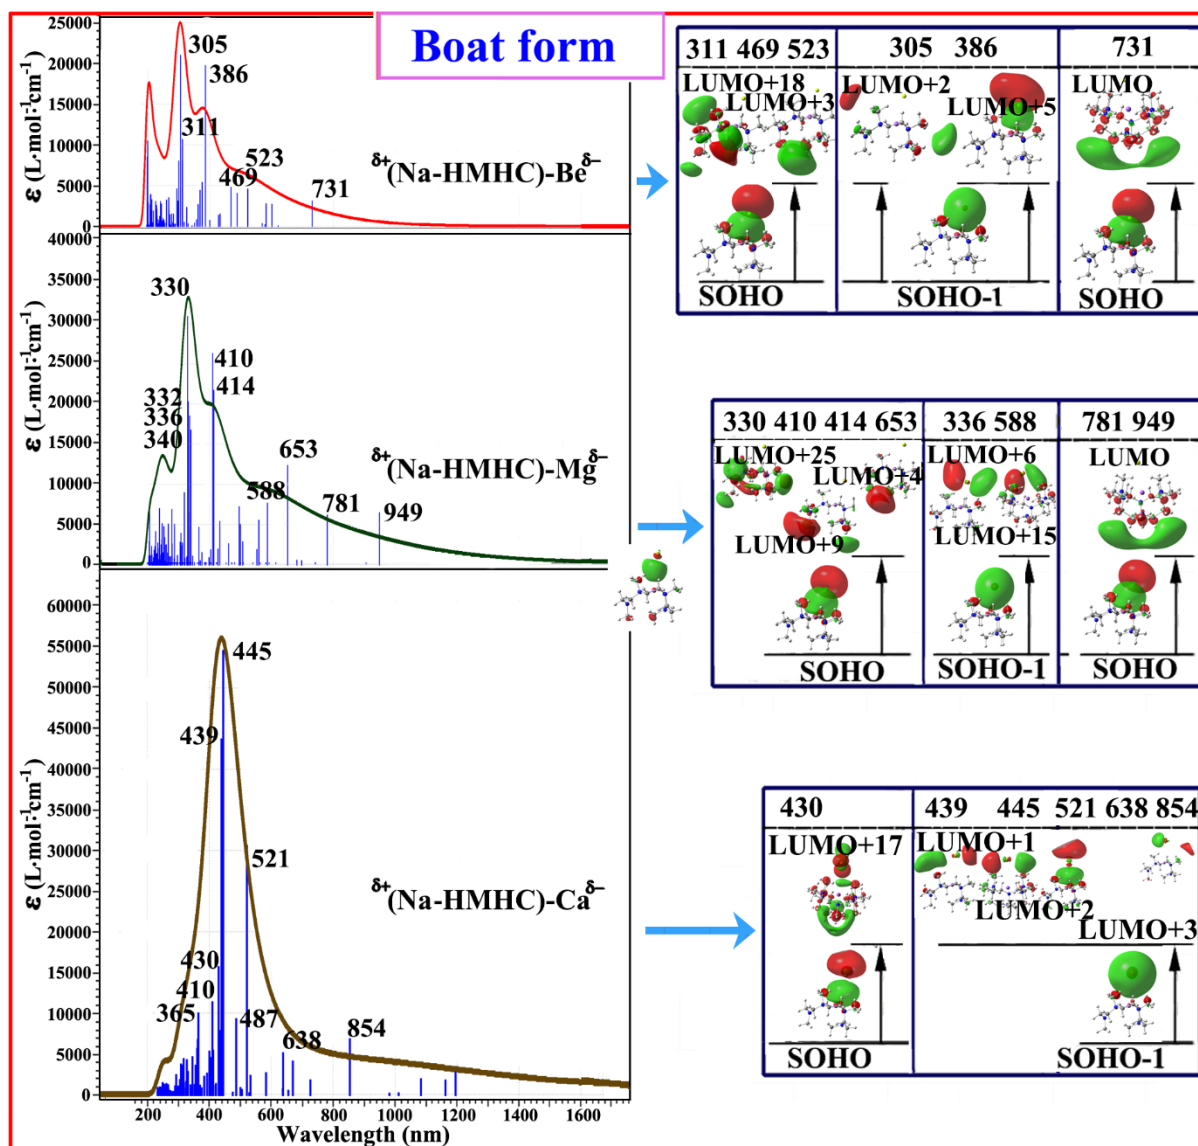

Fig. S5. Electronic absorption spectra of boat forms of  $\delta^+$ (Na-HMHC)-AM $\delta^-$ , (AM $\delta^-$  = Be, Mg & Ca).

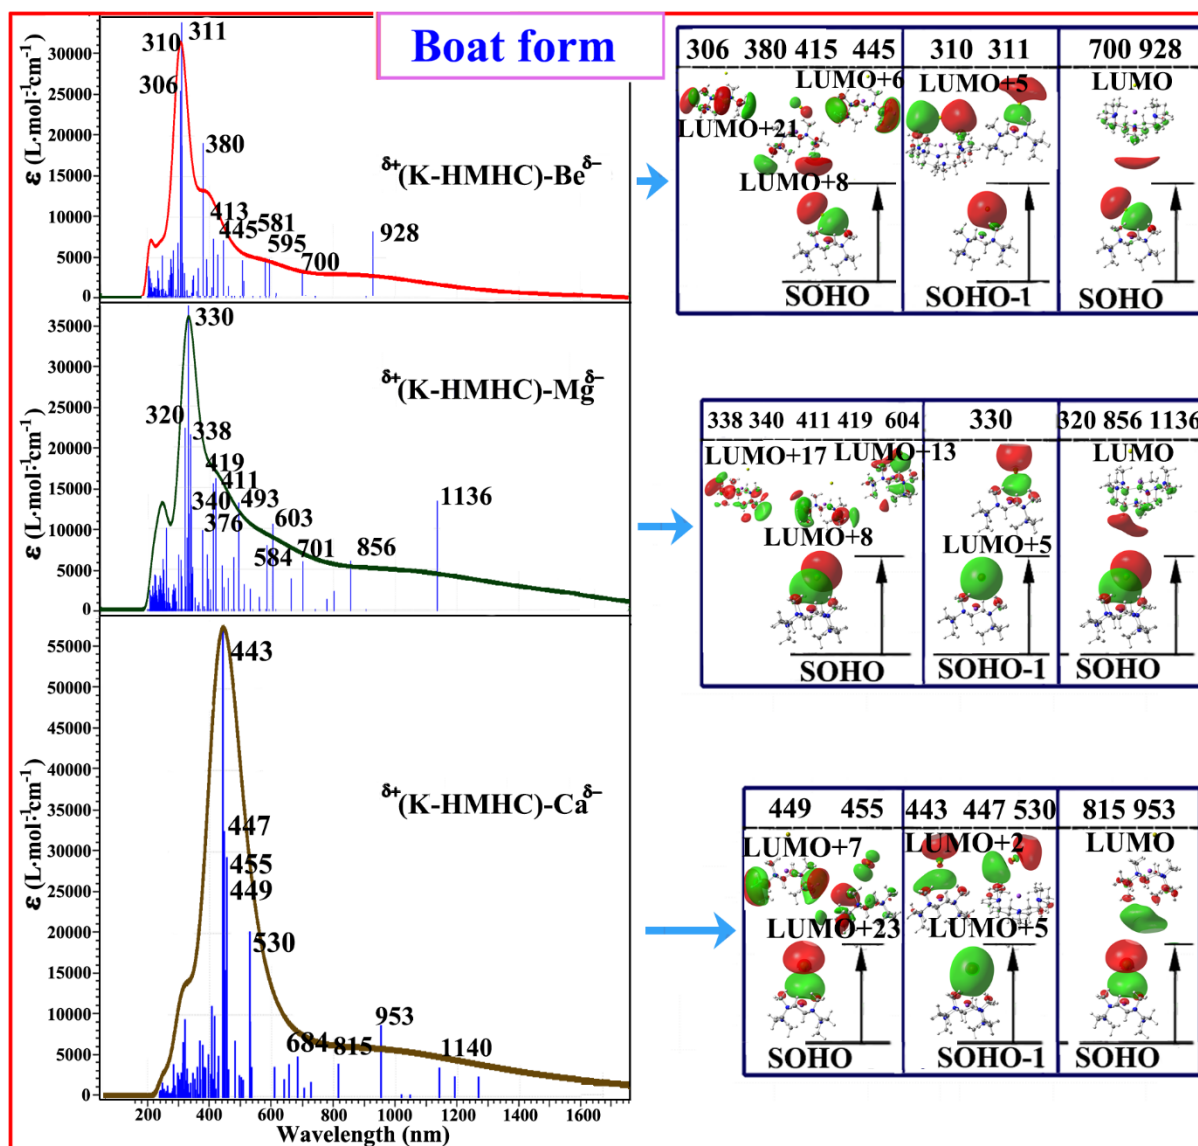

Fig. S6. Electronic absorption spectra of boat forms of  $\delta^+(\text{K-HMHC})\text{-AM}'^{\delta^-}$ , ( $\text{AM}' = \text{Be}, \text{Mg} \& \text{Ca}$ ).
